# 1 The human cytomegalovirus UL116 glycoprotein is a chaperone to control gH- 2 based complexes levels on virions

3  
4 Giacomo Vezzani<sup>1,4\*</sup>, Diego Amendola<sup>1\*</sup>, Dong Yu<sup>2</sup>, Sumana Chandramuli<sup>2#</sup>, Elisabetta Frigimelica<sup>1</sup>, Domenico  
5 Maione<sup>1</sup>, and Marcello Merola<sup>1,3@</sup>

6 <sup>1)</sup> GSK, Siena, Italy

7 <sup>2)</sup> GSK, Rockville, U.S.A.

8 <sup>3)</sup> Department of Biology, University of Naples “Federico II” - 80126 Naples, Italy

9 <sup>4)</sup> Department of Pharmacy and Biotechnologies, University of Bologna “Alma mater studiorum” – 40126  
10 Bologna, Italy

11 \*These two authors contributed equally to this work

12 #Present address: Moderna Therapeutics Inc., Cambridge, MA, USA.

13 @Corresponding author: [marcello.x.merola@GSK.com](mailto:marcello.x.merola@GSK.com); [m.merola@unina.it](mailto:m.merola@unina.it);

## 14 15 ABSTRACT

16  
17 Human cytomegalovirus (HCMV) relies in large part upon the viral membrane fusion glycoprotein B  
18 (gB) and two alternative gH/gL complexes, gH/gL/gO (Trimer) and the gH/gL/UL128/UL130/UL131A  
19 (Pentamer) to enter into cells. The relative amounts of the Trimer and Pentamer vary among HCMV  
20 strains and contribute to differences in cell tropism. Although the viral ER resident protein UL148 has  
21 been shown to interact with gH to facilitate gO incorporation, the mechanisms that favor the assembly  
22 and maturation of one complex over another remain poorly understood. HCMV virions also contain an  
23 alternative non-disulfide bound heterodimer comprised of gH and UL116 whose function remains  
24 unknown. Here, we show that disruption of HCMV gene *UL116* causes infectivity defects of ~10-fold  
25 relative to wild-type virus and leads to reduced expression of both gH/gL complexes in virions.  
26 Furthermore, gH that is not covalently bound to other viral glycoproteins, which are readily detected in  
27 wild-type HCMV virions, become undetectable in the absence of *UL116* suggesting that the gH/UL116  
28 complex is abundant in virions. We find evidence that UL116 and UL148 interact during infection  
29 indicating that the two proteins might cooperate to regulate the abundance of HCMV gH complexes.  
30 Altogether, these results are consistent with a role of UL116 as a chaperone for gH during the assembly  
31 and maturation of gH complexes in infected cells.

32  
33 **Key Words:** Human cytomegalovirus, gH, UL116, Pentamer, gH/gL/gO, chaperone.

## INTRODUCTION

Human cytomegalovirus (HCMV) infects most of the population primarily with an asymptomatic infection in immunocompetent individuals followed by a lifelong latent infection persisting in precursors of dendritic and myeloid cells (1-3). Reactivation and re-infection is a serious health problem in immunosuppressed patients where it represents the major causes of severe diseases or fatal outcome (4). In transplanted recipients, HCMV accelerates the rate of graft failure and vascular diseases (5). Furthermore, HCMV congenital infection remains a major problem associated to fetus neurodevelopmental delay or hearing/vision defects at birth (6).

This wide plethora of HCMV-associated disease likely relates to the ability of the virus to infect a diverse range of cell types, including epithelial and endothelial cells, fibroblasts, monocyte/macrophages, dendritic cells, hepatocytes, neurons, and leukocytes (7). This broad cell tropism may reflect the relative abundance of distinct glycoprotein complexes in the virion envelope. Together with glycoprotein B (gB), the gH/gL dimer comprises the “core membrane fusion machinery” conserved among all herpesviruses and is likely to regulate the fusogenic activity of gB (8). However, HCMV encodes a set of proteins that bind alternatively to gH/gL that modify or regulate the activity of the gB-gH/gL core fusion machinery leading to different tropism during the virus spreading in host cells (9). In particular, in HCMV, gH/gL exists on the viral surface as part of a trimeric complex with gO (gH/gL/gO, Trimer) or as a pentameric complex with UL128, UL130 and UL131A (gH/gL/UL128/UL130/UL131A, Pentamer) (10, 11). The presence of the Trimer, although required for entry into all cell types, is sufficient only for fibroblast infection while virus carrying Pentamer greatly expand cell tropism (12) recognizing different cellular receptors. Fibroblast entry relies on Trimer binding to platelet-derived growth factor receptor alpha (PDGFR- $\alpha$ ) and ectopic expression of this receptor in PDGFR- $\alpha$  non-expressing cells restores infection of HCMV lacking Pentamer (13-15). As for the Pentamer, two groups have recently reported the identification of distinct receptors responsible for epithelial tropism. Using a cell-independent screening on purified ectodomain of single transmembrane human receptors, Martinez-Martin *et al.* have identified Neuropilin-2, that recognize the pUL128 and pUL131A subunit on the Pentamer, as an essential molecule for HCMV entry (16). Via a CRISPR/Cas9 genetic screening of human cells, E. *et al.* identified the 7 TM olfactory receptor OR141I associated with G proteins as Pentamer target required for endocytosis of the virus and subsequent infection (17).

While differential expression of these receptors influences permissivity to HCMV infection, at least for fibroblasts and epithelial cell types the viral infectivity relies upon the presence of the two gH-based complexes. The relative abundance of Trimer and Pentamer complexes in virions is strain-specific and influence cell tropism and infectivity (18). How the formation of the two gH/gL complexes is regulated at the molecular level remains currently largely unknown although two recent reports identified two potential players. Li *et al.* identified an ER-resident viral protein encoded by the UL148 gene (UL148) that influences the ratio of Trimer to Pentamer and the cellular tropism of HCMV virions (19). Deletion of UL148 from the viral genome impairs incorporation of the Trimer into virions, leading to a reduced capacity of viral particles to establish infection in fibroblasts while increasing level of infection in epithelial cells (19). The opposite outcome was observed by Lukanini *et al.* using an *US16*-null virus which generated a Pentamer-deprived viral progeny that resulted unable to entry epithelial/endothelial cells (20). Whether these two viral proteins participate to form a tropism switch during the HCMV life cycle is unknown, however, this finding would imply a more complex system likely involving host proteins.

78 Among HCMV envelope proteins we identified UL116 as a gH interacting protein that forms  
79 noncovalent dimers alternative to gH/gL (21). In transient expression, gH and UL116 do not exit the ER  
80 unless they are co-expressed. The gH/UL116 complex migrates through the secretory pathway in the  
81 absence of other viral subunits suggesting that the antagonism with gL occurs once in the ER. Although  
82 the viral envelope localization of UL116 indicates a direct role in viral infection, its competition with  
83 any other gH/gL-based complex might reflect a role in the shaping of the envelope complexes.

84 In this work we found that, in the absence of UL116, cell-free viral spreading is reduced of about  
85 10-folds with evidence of envelope gH/UL116 involvement. We addressed the role of UL116 in the early  
86 formation of gH-based viral envelope complexes and its interaction with UL148. We generated HCMV  
87 TR strain lacking the expression of either UL116 or UL148 to analyze the contribution of UL116 to  
88 complex choice and its potential interaction with UL148. We found that UL116 expression is required  
89 for the wt levels of both Trimer and Pentamer in virions produced by fibroblasts and epithelial cells.  
90 Furthermore, we also revealed a direct interaction of UL116 with UL148 in cells. These data collectively  
91 support the model of UL116 chaperoning gH during the early phases of complexes assembly.

92

93

## Materials and Methods

94

### ***Protein purification, reagents, plasmids and antibodies.***

95 Trimer, Pentamer and gH/UL116 heterodimer were purified as previously described (21, 22).

96 Primary antibodies: anti-Pentamer was raised by immunizing rabbits with purified whole Pentamer  
97 protein (22) and purifying IgG from the serum over Protein A column. UL116 monoclonal antibody was  
98 produced in mouse following immunization with purified gH/UL116 and hybridomes screening. mouse  
99 mAb to Cytomegalovirus IE1 and IE2 (Abcam, ab53495), mouse mAb to Cytomegalovirus pp65  
100 (Abcam, ab6503), rabbit pAb to Strep tag (Abcam, ab119810), 6xHis Tag Antibody (Invitrogen, MA1-  
101 213115), anti-KDDDDK Tag antibody (Invitrogen, MA1-91878), Monoclonal antibody anti-GAPDH  
102 produced in mouse (SIGMA, G8795-200UL), Myc Tag monoclonal antibody (Sigma-Aldrich, 05-724),  
103 anti-gH human monoclonal antibody MSL109 was a generous gift of Dr. Adam Feire of the Novartis  
104 Institute for Biomedical Research (NIBR, Cambridge, MA, USA).

105 Secondary antibodies used are: Goat anti-mouse IgG (H+L) highly cross-adsorbed Alexa fluor plus  
106 647 secondary antibody (Sigma-Aldrich, A32728), Goat anti-mouse IgG (H+L) secondary antibody HRP  
107 (Invitrogen, 62-6520) and Goat anti-rabbit IgG (H+L) secondary antibody HRP (Invitrogen, 62-6120).

108 HEK-293T transfections were carried out with Lipofectamine 2000 (Thermo Fischer) according to  
109 the manufacturer's protocol. The HEK-293T transfected cells were trypsinized 48h post-transfection and  
110 treated for immunoprecipitation assays

111 gH\_myc, UL116 and UL148-6XHIS were expressed following cloning of the codon optimized  
112 sequence in pcDNA3.1(-) plasmid.

113 All primers used are listed in Table 1.

114

115

### ***Binding assay to HFF-1 and ARPE-19 cells***

116 For the binding of gH/UL116, Trimer and Pentamer to cells, trypsinized HFF-1 or ARPE-19 were  
117 divided in identical aliquot of  $3 \times 10^5$  cells. Cells were first incubated for 20 min at room temperature  
118 (RT) with Live/Dead Aqua diluted 1:400 in PBS and then for 60 min with blocking buffer (PBS with 1%  
119 Bovine Serum Albumin (BSA) and 200  $\mu$ g/ml of gH/UL116, Trimer or Pentamer recombinant complexes  
120 were incubated for 60 min at RT. All complexes were 6xHis-tagged. After three washes in PBS, mouse  
121

122 monoclonal anti-His and Alexa Fluor 647-conjugated anti-mouse antibodies were used to reveal the  
123 binding. A total of  $10^5$  cells were analyzed for each histogram using FACS BD Canto II (Becton  
124 Dickinson, Heidelberg, Germany).

125  
126

### 127 **Cell Lines**

128 HFF-1 (Human [*Homo sapiens*] skin/foreskin normal fibroblasts; SCRC-1041), MRC-5 (Human  
129 [*Homo sapiens*] lung normal fibroblasts; CCL-171), ARPE-19 (Human [*Homo sapiens*] retinal  
130 pigmented normal epithelial cells; CRL-2302), HEK293T (Human [*Homo sapiens*] embryonic kidney  
131 epithelial cells; CRL-1573) cells were obtained from ATCC. HFF-1 cells were cultured in Dulbecco's  
132 Modified Eagle Medium (DMEM, ATCC 30-2002) supplemented with 15% fetal bovine heat inactivated  
133 serum (FBS, ATCC 30-2020), 100 I.U./mL penicillin and 100 mg/mL streptomycin (Penicillin-  
134 Streptomycin, internally produced). MRC-5 and HEK293T cells were cultured in Eagle's Minimum  
135 Exential Medium (EMEM, ATCC 30-2003) supplemented with 10% fetal bovine heat inactivated serum,  
136 100 I.U./mL penicillin and 100 mg/mL streptomycin. ARPE-19 cells were cultured in Dulbecco's  
137 Modified Eagle Medium/Nutrient Mixture F-12 (DMEM/F-12, ATCC 30-2006) supplemented with 10%  
138 fetal bovine heat inactivated serum, 100 I.U./mL penicillin and 100 mg/mL streptomycin. All cell lines  
139 were grown at 37°C with 5% CO<sub>2</sub>.

140  
141

### 141 **Viruses**

142 A bacterial artificial chromosome (BAC) containing the genome of the HCMV TR strain was  
143 obtained from Oregon Health Science University (23) and was integrated with a GFP immediate early  
144 expressing gene cassette in the intergenic region between US32 e US33A genes. TR, a clinical HCMV  
145 strain derived from an ocular vitreous fluid sample from a patient with HIV disease (24), was cloned into  
146 a BAC after limited passage in fibroblasts (23). HCMV strain TR-GFP (TRG) and each recombinant  
147 virus were propagated in HFF-1 fibroblasts grown to 70-80% confluency, as previously described (Cell  
148 Lines, STAR Methods), using infectious supernatants at a MOI of 1. Infection of ARPE-19 cells was  
149 performed at a MOI of 5. Infection was visualized at 24 hpi (hours post-infection) by GFP-fluorescence  
150 inside cells. At 100% CPE (or GFP signal) or 50% of cells detached from the plate, medium supernatant  
151 was collected and cleared of cell debris by centrifugation for 15 min at 4,000 × g at 4°C before aliquoting  
152 and storing at -80°C.

153 To titrate viruses, we used a Titration Assay previously described (25) with minor modifications.  
154 In brief, 5-fold serial dilutions of samples were performed in DMEM supplemented with 1% fetal bovine  
155 heat inactivated serum and 1 mM sodium pyruvate, and 150 µl of each dilution was applied to duplicate  
156 wells of a 96-well flat bottom cluster plate containing  $2 \times 10^4$  HFF-1 fibroblasts, incubated over-night  
157 (O/N) at 37°C with 5% CO<sub>2</sub> before infection. At 24 hpi, the infected cells were trypsinized and transferred  
158 in a 96-well round bottom cluster plate. To evaluate the number of cells with GFP-signal, we performed  
159 FACS analysis with BD LRSII Special Order System (Becton Dickinson, San Jose, CA) equipped with  
160 High Throughput Sampler (HTS) option. Titer was calculated using the following equation: Titer (IU/ml)  
161 =  $(N \times P)/(V \times D)$  [Note: N = Cell Number in each well used for infection day; P = percentage of GFP  
162 positive cells (considering the dilution virus exhibiting GFP signal < 40%); V = virus volume used for  
163 infection in each well (ml); D = dilution fold; IU = infectious unit].

164 For kifunesine treatment, six T75 flasks were seeded with HFF-1 cells and infected with HCMV  
165 TRG (2 flask) and TRG-*UL116*-null (2 flasks) at MOI of 1. After 72 hours, kifunesine (Sigma-Aldrich,  
166 K1140) was added to the final concentration of 5 µM in the culture media of three flasks (uninfected  
167 HFF-1, TRG infected HFF-1 and TRG-*UL116* null infected HFF-1). The same amount of sterile distilled

168 water was added to the remaining 3 flasks. 48 hours after drug treatment, cells were harvested, lysed and  
169 treated for western blot analysis in reducing and nonreducing conditions.

170

### 171 ***BAC Mutagenesis***

172 To generate recombinant viruses a Two-step Red-mediated recombination method has been used  
173 as previously described (26) with minor modifications. BAC TR-GFP was used as starting template. In  
174 brief, kanamycin resistance cassette, flanked by I-SceI restriction enzyme cleavage sites, was amplified  
175 from pEPkan-S shuttle vector using primers containing homologous regions for the integration in the  
176 region of interest. Recombination events were performed with *E. coli* GS1783 strain containing a BAC  
177 clone of the HCMV TR-GFP (TRG) strain, the lambda Red system under the control of a heat-inducible  
178 promoter and the I-SceI genes under the control of an arabinose-inducible promoter (27). The first  
179 recombination step consists in the electroporation of the purified PCR-amplified cassette in competent,  
180 heat-induced GS1783 cells. Positive clones for cassette integration were selected based on kanamycin  
181 resistance and screened both by PCR and sequencing. The second recombination was triggered through  
182 both heat-shock and arabinose and results in the excision of the kanamycin resistance, leaving the  
183 mutation in frame with the gene of interest. Putative clones were screened by PCR and sequencing  
184 analyzed by Vector NTI.

185

186

### 187 ***Reconstitution of infectious viruses***

188 To reconstitute the virus MRC-5 fibroblasts were electroporated (nucleofected) using a Cell Line  
189 Nucleofector Kit V Lonza VCA-1003) according to the manufacturer's protocol. In brief, for each  
190 reaction,  $1 \times 10^6$  freshly trypsinized MRC-5 fibroblasts were pelleted by centrifugation at  $300 \times g$  for 5  
191 min, washed two times with PBS and then resuspended in a solution containing 1,5  $\mu g$  of BAC and 0,3  
192  $\mu g$  of pcDNA3.1-pp71 plasmid premixed with 100  $\mu L$  of Nucleofector solution (82  $\mu L$  of Nucleofector  
193 solution and 18  $\mu L$  of supplement). Cotransfection of HCMV protein pp71-expressing plasmid markedly  
194 increases the efficiency of virus reconstitution from transfection of infectious viral DNA since pp71 acts  
195 as a viral transactivator to help initiate lytic infection (28). The cell suspension was then electroported  
196 using a Nucleofector II (program D-023) and then plated and cultured in DMEM supplemented with 1%  
197 fetal bovine heat inactivated serum and 1 mM sodium pyruvate. 24h after electroporation, medium was  
198 changed and cells were cultured by standard methods. When cells exhibited 100% CPE (or GFP signal,  
199 observed with a Zeiss Axiovert 200) or 50% of cells were detached from the plate, medium supernatant  
200 was collected and cleared of cell debris by centrifugation for 15 min at  $4,000 \times g$ ,  $4^\circ C$  before aliquoting  
201 and storing at  $-80^\circ C$ . To determine virus titer the "Titration Assay" has been performed as previously  
202 described (Viruses, STAR METHODS).

203

### 204 ***HCMV Virions purification***

205 The supernatant of infected cells was collected 7 days (HFF-1) or 8 days (ARPE-19) after infection  
206 and centrifuged for 15 min at  $4,000 \times g$ ,  $20^\circ C$  to clear all cell debris. Cleared supernatant was transferred  
207 to polycarbonate ultracentrifuge tubes under lied with 20% sucrose cushion and centrifuged at 30,000  
208 rpm in a Beckman SW32Ti rotor for 50 minutes. The virus-containing pellet was solubilized in 1% Triton  
209 X-100 in PBS and protease inhibitors (EDTA-free EASYpack Protease Inhibitor Cocktail (Sigma-  
210 Aldrich) and finally equilibrated in SDS-PAGE loading buffer for western blot analysis.

211

212

213

214

215 ***Immunoprecipitations***

216 HFF-1 cells were infected at MOI of 1 with HCMV TRG-wt, TRG-UL148-myc or TRG-*UL148*-  
217 null. Infection was allowed to proceed for 6 DPI and then cells were washed in 1× PBS, lysed with  
218 Mammalian CellLytic (Sigma-Aldrich) in presence of protease inhibitors. Five hundred micrograms of  
219 total protein extracts were incubated overnight at 4°C with 5 µg of Myc Tag Monoclonal Antibody, anti-  
220 UL116 Monoclonal Antibody or anti-gH Human Monoclonal Antibody. Complexes were pulled down  
221 using Dynabeads Protein A/G (Sigma-Aldrich, 14321D) according to the manufacturer's protocol.  
222 Recovered beads were washed in lysis buffer and then boiled for 5 min in 2X SDS-PAGE loading buffer  
223 with reducing agent. Eluted proteins were separated on SDS-PAGE and immunoblotting performed as  
224 described above.

225 A similar procedure was applied to recover immunocomplexes from transfected HEK293T cells. 3  
226 X 10<sup>5</sup> HEK293T cells per well were seeded in a 6 wells plate and incubated O/N at 37°C. The day after,  
227 cells were transfected with 10 µg of each plasmid. Extracts were then used for immunoprecipitation  
228 procedure using 5 µg of each antibody (gH Human Monoclonal Antibody, myc Tag Monoclonal  
229 Antibody and UL116 H4).

230

231

232 ***Immunoblotting***

233 Proteins were separated by sodium dodecylsulfate-polyacrylamide gel electrophoresis (SDS-  
234 PAGE) on 4-12% polyacrylamide pre-cast gels (Bolt 4-12% Bis-Tris Plus Gels) under reducing or  
235 nonreducing conditions. Proteins were transferred to nitrocellulose membranes (iBlot 7-Minute Blotting  
236 System, Invitrogen), and membranes were blocked with PBS containing 0.1% Tween 20 (ThermoFisher,  
237 TA-125-TW) and 10% powdered milk (Sigma-Aldrich, M7409). Antibodies were diluted in PBS  
238 containing 0.1% Tween 20 and 1% powdered milk. For detection of primary antibody binding,  
239 horseradish peroxidase-conjugated anti-rabbit or anti-mouse IgG antibodies and the Chemiluminescent  
240 Peroxidase Substrate (Sigma-Aldrich, 34578) were used, according to the manufacturer's instructions.  
241 The densitometric analysis of signal intensity in Western blotting was performed with ImageLab  
242 software.

243

244

245

246

247

248

## RESULTS

249

250 ***Construction of HCM TR-GFP (TRG) strain mutants and cell-free viral growth in human fibroblast***  
251 ***and epithelial cells.***

252 To characterize the role of UL116 in viral pathogenesis, we first checked cell-free infectivity in the  
253 absence of UL116. We generated a recombinant virus that do not express the UL116 protein by inserting  
254 a stop codon close to the N-terminus of the UL116 open reading frame (ORF). UL148 is a HCMV ER  
255 resident protein reported to bind gH and influence the gH-based complexes formation (19). We  
256 constructed a mutant virus lacking UL148 expression to be studied in parallel. Finally, to detect UL148  
257 in infection, we constructed a recombinant virus expressing UL148-myc tagged protein. In figure 1 is

258 depicted the map of viruses used in this study. All viruses were generated from the bacterial artificial  
259 chromosome (BAC) containing the HCMV TR strain to which the GFP gene was introduced between  
260 US32 e US33A genes. This template was used to generate recombinant viral genomes via a marker-less  
261 two-step RED-GAM BAC mutagenesis (29). The TR-GFP wt (to which we will refer to as TRG) was  
262 used to generate the TRG-*UL116*-null, the mutant lacking UL116 expression by insertion of a single  
263 nucleotide between residues 4-5 to generate stop codon immediately afterwards, and the TRG-UL148-  
264 myc, containing the tag at the C-terminus. The latter was used as template to generate the TRG-*UL148*-  
265 null in which a stop codon was introduced at position 4 of the *UL148* ORF.

266 Fibroblasts have always been the standard cell type for isolation and propagation of HCMV from  
267 patient samples and are still the most efficient producer cell line irrespective of the virus strain. As first,  
268 we investigated cell-free replication into human foreskin fibroblasts (HFF) to verify if the mutations  
269 introduced in our recombinant viruses could have effect on viral growth. HFF-1 cells were infected at a  
270 multiplicity of infection (MOI) 1 and aliquots of media collected up to 7 days. Production of cell-free  
271 virus was measured by titrating infectious viruses secreted in cell media on fresh HFF-1 cells. As shown  
272 in figure 2A, replication of the TR-*UL148*-null virus was identical to the wt while the TRG-*UL116*-null  
273 show a reduction of about 10 times. These data indicate that eradication of UL116 expression influence  
274 viral replication and/or infectious ability.

275 Apart from fibroblasts, epithelial cells are one of the major targets of HCMV infection and are  
276 assumed to play an important role during host-to-host transmission since they lay all external body  
277 surfaces. We sought to repeat the same analysis on ARPE-19 epithelial cells to verify if mutants had a  
278 differential tropism. ARPE-19 cells were infected at a multiplicity of infection (MOI) 5 and aliquots of  
279 media collected up to 10 days. As it can be seen in figure 2B, viral secretion from epithelial cells  
280 displayed one day delay in viral secretion compared to fibroblasts but the titers measured at plateau  
281 mirrored what observed in fibroblasts. The TRG-*UL116*-null virus showed 0.65 log lower titer at plateau  
282 with respect to the wt or TRG-*UL148*-null. To note that our TR strain not expressing UL148 did not  
283 reproduced the behavior reported by Li et al. who found and increased epithelial tropism (19).

284 Results from these experiments suggest that the TR strain impaired cell-free virus production in  
285 absence of UL116 is cell type independent.

286

### 287 ***Soluble gH/UL116 does not bind to fibroblasts and epithelial cells***

288 We speculated that virion envelope-bound gH/ UL116 dimer might facilitate virus to attach the  
289 host cell contributing to viral attachment and/or entry, and therefore lacking UL116 might be responsible  
290 for the observed reduction in viral titer of the TRG-*UL116*-null virus. To test this hypothesis, we  
291 investigated the binding of the gH/UL116 heterodimer to fibroblasts and epithelial cells. We expressed  
292 and purified soluble recombinant gH/UL116 tagged with 6xHis and strep respectively (21) and checked  
293 binding to HFF and ARPE-19 cells by FACS analysis. Recombinant Trimer and Pentamer were used as  
294 control. As expected, strong binding of the Trimer to fibroblasts and of the Pentamer to epithelial cells  
295 were revealed whereas no binding of gH/UL116 to both cells could be revealed (figure 2C). This finding  
296 indicates that gH/UL116 does not target a high affinity receptor on cultured fibroblast and epithelial cells.

297

298 ***Expression levels of the major HCMV envelope proteins in infected cells and their incorporation***  
299 ***into secreted virions.***

300 Zhang et al. asserted that the differential tropism and infectivity of distinct strains is also function  
301 of the relative levels of Trimer, Pentamer and gH/gL carried by virions (18). This observation encouraged  
302 us to verify the levels of expression of the gH-based complexes proteins in absence of UL116 and/or  
303 UL148 both in virions and in infected cells. HFF-1 cells were infected with wt and mutant viruses at  
304 MOI of 1 for 7 days, then culture media were collected for viral purification on sucrose cushion gradient  
305 and cells were harvested. Pelleted virions and cells were then lysed in detergent containing buffer and  
306 analyzed by western blot in both reducing and nonreducing conditions. Free gH, Trimer, and Pentamer  
307 complexes were analyzed on SDS-PAGE in non-reducing conditions in which free gH, gH/gL/gO  
308 (Trimer), and gH/gL/UL128 (Pentamer) complex migrated at an apparent MWs around 85-90, 260, and  
309 150 kDa respectively (Figure 3) (22). Densitometric analysis of the immunoblot were performed and the  
310 intensity of the bands corresponding to the different species was compared.

311 gH-based complexes immunoblot on virions is shown in figure 3A. The TRG wt showed Trimer  
312 as major complex on the envelope as previously described (18) and high level of gH although only a  
313 minority as gH/gL. The TRG-*UL116*-null mutant revealed a strong reduction of Trimer almost  
314 comparable to the expected band found in the TRG-*UL148*-null virions (lanes 2 and 3 of figure 3A). The  
315 levels of Pentamer carried by the two mutated viral particles showed opposite outcome. TRG-*UL148*-  
316 null virions exhibited higher levels of Pentamer (lane 3 of figure 3A) as previously reported (19),  
317 whereas, in absence of UL116, considerable reduction of the Pentamer was observed (lane 2 of figure  
318 3A). Interestingly, in TRG-*UL116*-null mutant virions, the levels of non-disulfide bound gH became  
319 undetectable. This suggests that a relevant amount of the viral gH not engaged in Trimer or Pentamer is  
320 normally present on the viral envelope associated to UL116. Finally, the TRG-*UL148*-null virions carried  
321 remarkably high levels of gH and UL116, likely as dimer, compared to the wt (lanes 1 and 2 of figure  
322 3A). Altogether, these data indicate that the absence of UL116 impair incorporation of both gH/gL  
323 complexes in the viral particles whereas the loss of UL148 promotes increased incorporation in virions  
324 not only of Pentamer but also of the gH/UL116 dimer.

325 A representative western blot analysis of infected HFF-1 whole cell lysates (WCL) is displayed in  
326 figure 3B. Densitometric analysis consider values variation of three independent experiments  
327 normalizing on the intensity of the tegument protein pp65. Both mutants showed a reduced level of the  
328 Trimer and the Pentamer complexes (figure 3B). Cellular pool of free gH in the two mutants were reduced  
329 compared to the wt in an almost identical manner and not completely absent from the TRG-*UL116*-null  
330 mutant as observed in virions (compare lanes 2 of figure 3A and 3B). This suggests that contemporary  
331 expression of both UL116 and UL148 is required to completely stabilize intracellular pool of gL-free  
332 gH. Viral protein expressed in the cellular extracts of TRG-*UL148*-null mutant infected HFF-1 showed  
333 both a pronounced reduction of the Trimer and high levels of UL116. These results suggest a close  
334 relationship between gH, UL116 and UL148 in the ER of fibroblasts.

335 Identical experiments were performed on extracts from infected ARPE-19 cells and virions  
336 produced in this cell line. ARPE-19 cells were infected at a MOI of 5 and incubated for 8 days. At the  
337 end of this period, cell culture media were used for virus preparations on sucrose cushion while cells  
338 were harvested and lysed in detergent containing buffer. Representative western blots from these  
339 experiments are shown in figure 4 as well as densitometric analysis of the gH-based complexes, mediated  
340 on three independent experiments, are graphed in the bottom of the figures. The absence of UL116 lead  
341 to the disappearance of free gH on virions in nonreducing conditions (lane 2 of figure 4A) whereas we



342 observed a roughly 50% reduction in infected cells (lane 2 of figure 4B). These results are consistent  
343 with the one obtained in fibroblasts (lanes 2 of figure 3A-4A and 3B-4B respectively) and with a role of  
344 UL116 in stabilizing and promoting gL-free gH incorporation into virions. The levels of the gH-based  
345 complexes carried by TRG-*UL116*-null virions produced by epithelial cells was less than half of both  
346 Trimer and Pentamer with respect to the wt (lanes 2 of figure 4A). As expected, TRG-*UL148*-null virions  
347 showed reduced Trimer and increased Pentamer but also higher amount of UL116 (lane 1 of figure 4A).  
348 Thus, unbalanced viral incorporation of gH-based complexes was observed in virion produced after  
349 infection of both cell lines and for both mutants.

350 Analysis of the relative levels of gH-based complexes performed in cell lysates from wt and  
351 mutants infected ARPE-19 is shown in figure 4B. TRG-*UL116*-null mutant showed reduced levels of  
352 Trimer and Pentamer (lane 2 of figure 4B) although this reduction was less pronounced with respect to  
353 what observed in fibroblasts (graphs of figure 3B and 4B). Non covalently bound gH is present at low  
354 levels, the majority likely degraded for the absence of UL116. The levels of HCMV complexes in ARPE-  
355 19 cells infected with the TRG-*UL148*-null mutant differed from what found in fibroblasts. The levels  
356 of Trimer were almost as the wt indicating an intracellular accumulation without productive insertion  
357 into virions. The intracellular amount of non-covalently bound gH was equal to the wt (lane 3, figure 4B)  
358 suggesting that ARPE-19 may present factors that stabilize this glycoprotein that are absent in fibroblasts.

359 Taken together, this analysis reveals similar picture in virion compositions of particles derived  
360 from fibroblasts and epithelial cells assessing a crucial role for UL116 and UL148 to generate a pattern  
361 of gH complexes typical of the TR HCMV strain. Difference in the intracellular population of HCMV  
362 glycoproteins among the two different cell type could suggest differential pattern of interactors that, in  
363 epithelial cells, can stabilize HCMV species but not allow insertion on viral particles. Thus, both proteins  
364 may act in increasing proper assembly of gH-based complexes.

365

### 366 ***Kifunesine treatment partially restore gH levels in TRG-UL116-null mutant***

367 Data shown so far suggest that UL116 acts as gH “escort” protein implying that in its absence gH  
368 would be degraded faster by the endoplasmic reticulum associated degradation (ERAD) machinery. To  
369 test this hypothesis, we used the ER mannosidase inhibitor kifunesine that hinder mannose trimming of  
370 the oligosaccharide chain and further recognition by the ERAD factors (30). We reasoned that, in  
371 presence of this inhibitor, gH must accumulate in the ER and we analyzed extracts of infected cells  
372 treated and untreated with this drug. Results are shown in figure 5. In reducing conditions, gH levels in  
373 the cellular extract of TRG-*UL116*-null infected HFF-1 dropped to about 40% compared to the TRG wt  
374 (lanes 1 and 3 of figure 5) whereas was rescued to about 80% following kifunesine treatment (figure 5,  
375 lanes 2 and 4). As expected, in nonreducing conditions the base levels of free-gH in the extract derived  
376 from TRG-*UL116*-null infection dropped to 20% (figure 5, lane 3) and it was rescued to 40% upon  
377 kifunesine treatment. Level of two other HCMV proteins, gB and pp65, were not modified by the drug  
378 (figure 5). From this data we deduced that UL116 protects gH from an accelerated degradation.

379

### 380 ***Co-immunoprecipitation in infected and transfected cells.***

381 Our data suggested that UL116 assist gH in its folding indicating a possible interaction with the  
382 viral ER resident protein UL148 which was shown to play a role in gH-based complexes choice. We

383 asked if the two proteins could have a direct contact in the early stages of viral glycoproteins assemble.  
384 To this aim, we performed co-immunoprecipitation experiments in extracts from HFF-1 cells infected  
385 with TRG, TRG-UL148-myc and TRG-*UL148*-null. In absence of a specific anti-UL148 antibody we  
386 used a virus carrying myc-tag at the C-terminus of UL148. Immunoprecipitated samples were resolved  
387 in SDS PAGE and immunoblotted with specific antibodies. Expression of all individual proteins was  
388 revealed by western blot of non-immunoprecipitated WCLs (figure 6, lanes 14-16). In TRG and TRG-  
389 *UL148*-null mutant, no UL148 could be detected by the anti-myc antibody and only co-  
390 immunoprecipitation of gH by anti-UL116 (figure 6, lanes 7 and 11) and of UL-116 by anti-gH (figure  
391 6, lanes 6 and 10) could be observed. In extracts infected with the TRG-UL148myc, however, UL148  
392 was co-immunoprecipitated not only by anti-gH but also by anti-UL116 (figure 6, lanes 2 and 3).  
393 Although this result suggests a direct interaction between UL116 and UL148, it does not discriminate  
394 whether they interact directly or if they are simultaneously associated to the same protein such as gH that  
395 has been reported to bind independently with both proteins (19, 21). Our result is consistent with these  
396 reports since anti-gH antibodies co-immunoprecipitated both UL116 and UL148 (figure 6, lanes 2 and  
397 6).

398 To provide evidence that UL116 and UL148 have a direct interaction, we performed co-  
399 immunoprecipitation in HEK-293T cells co-transfected with expression vectors for tagged individual  
400 HCMV proteins. For instance, plasmids used for transient transfection expressed 6xHis tagged gH,  
401 His/myc-tagged UL148 and Strep-tagged UL116. HEK-293T cells were transfected with different  
402 combination of the three expression plasmids and protein immunoprecipitations in whole cell lysates  
403 were carried out with human mAb MSL109, mouse mAb F11 and rabbit anti-myc for gH, UL116 and  
404 UL148 respectively. Proteins were revealed in western blot by anti-His, anti-myc, and mAb F11 for gH,  
405 UL148, and UL116 respectively. Figure 7 shows a representative result of such analysis. Expression of  
406 each protein was verified in western blot by immunoblotting an aliquot of WCLs (figure 7, lanes 17-24).  
407 As expected, both UL116 and UL148 co-immunoprecipitated with anti-gH (figure 7, lanes 2 and 3). Co-  
408 immunoprecipitation of UL148, via anti-myc antibody, pulled down both gH and UL116 glycoproteins  
409 when these species were individually co-expressed with UL148 (figure 7, lane 11 and 12 respectively).

410 All together, these results are consistent with a direct interaction between UL116 and UL148,  
411 indicating a possible coordination of these two proteins in the ER for the determination of gH-based  
412 complexes formation.

413

414

415

## DISCUSSION

416

417

418

419

420

421

422

423

424

425

426

427

428

429

In our previous study, we showed that the HCMV UL116 protein is a non-disulfide bound gH-associated factor alternative to gL and that the complex is inserted into the viral envelope of mature particles (21). We sought to further characterize the role of UL116 in the HCMV life cycle by generating UL116-null virus and checking the cell-free infectivity of the progeny. Consistent with the current literature (31, 32), we found that UL116 is a nonessential protein and the TRG-*UL116*-null mutant virus was able to infect both fibroblasts and epithelial cells although producing roughly 10- and 6-fold less virus respectively. The TRG used in this study showed a roughly identical cell-free replication in cultured fibroblasts and epithelial cells as well as the TRG-*UL148*-null mutant. This last result is in contrast with a previous report from the literature where the TB40-*UL148*-null virus increases replication in epithelial cells (19). As it was pointed out in a very recent and elegant report, we suppose that this difference may be due to the genetic background of different strains (33). As first, we speculated that the gH/UL116 dimer could recognize a receptor on target cells surface and we purified the complex and checked binding by FACS. The data we obtained indicate the absence of a high affinity binding and we did not further check other possibilities but proceeded focusing on the intracellular role of UL116.

430

431

432

433

434

435

436

437

438

439

440

441

The TRG wt virus used in this study showed predominant Trimer over Pentamer on virions, consistent with previous reports (12). The relative amount of both complexes was strongly reduced in purified viruses from the recombinant TRG-*UL116*-null mutant likely not as defect in synthesis but rather as impaired incorporation in infectious virions. We found that gH levels in infected cells are partially rescued following treatment with an ERAD inhibitor indicating that UL116 does act on gH turn over and likely on its correct folding. gH-based complexes in infected cells show a milder reduction, once more suggesting that the impaired step rely on the efficiency of the complexes' assembly. Indeed, virions derived from the TRG-*UL148*-null mutant were defective in the incorporation of Trimer but showed higher levels of Pentamer according to what reported in literature (19). Differently from UL148, known to favor Trimer formation versus Pentamer, lack of UL116 impair both gH/gL derived complexes thus its action must be rather on proper assistance to gH. These findings suggest that UL116 is part of the molecular machinery required for the correct maturation and assembly of the complexes.

442

443

444

445

446

447

448

449

450

451

452

453

454

455

The lower amount of Trimer and Pentamer on viral particles reduces but does not abolish cell-free infectivity of the virus, the reason why UL116 was not recognized as an essential protein (31, 32). The group led by Dr. Ryckman has performed a deep analysis on the relationship between the major HCMV envelope glycoproteins and viral infectivity. Among others, their reports showed that the cell-free infectivity is modulated by the relative ratio of Trimer and Pentamer incorporated into the virion and that, although Pentamer definitely control epithelial tropism, its abundance is not straightforward correlated with efficiency of infection in non-fibroblast cell types (9, 12, 18). Trimer alone is enough for entry into fibroblasts (13) whereas Pentamer, always required for infection in all other cell types (12, 13), extends viral tropism through recognition of specific receptors recently identified (16, 17). Although the cell type restricted receptors explain the tropism specificity, the molecular mechanism responsible for viral infectivity depends several factors including glycoprotein isoforms, relative ratio of the complexes, RL13 locus and still non identified loci (9, 12, 18, 34, 35). Our findings show that cell-free infectivity is slightly modified but still functional at reduced levels of gH-based complexes on viral particles and address the mechanism of the molecular machinery regulating HCMV glycoproteins assembly.

456 The choice of gH/gL complexes carried by the mature virions starts during the early phases of  
457 glycoproteins assembly in the ER. To date, two viral proteins favoring formation of either Trimer or  
458 Pentamer have been identified: UL148 and US16 respectively. The single transmembrane (TM) spanning  
459 ER resident UL148 protein promotes gO incorporation without interacting with this glycoprotein but  
460 rather subtracting it to degradation by specifically targeting the ERAD receptor Sel1L (19, 36). This  
461 interaction activates unfolding protein response (UPR) leading to an ER expansion whose benefit for  
462 viral replication remains unclear (37). US16 is a 7TM HCMV protein identified as tropism factor whose  
463 absence impairs viral replication in epithelial/endothelial cells at the level of entry or post-entry (38).  
464 Remarkably, US16 is required for incorporation of UL128-131 showing a direct interaction only with  
465 UL130 (20). UL148 and US16 favor the incorporation of either gO or ULs respectively, harmonizing the  
466 correct formation of envelope complexes and highlighting that the broad tropism is due to a fine  
467 regulation of complexes levels.

468 From these data, we propose the following model of viral proteins interactions during the early ER  
469 post-synthesis phase (figure 8). We hypothesize that UL116 is the first interactor of gH, stabilizing the  
470 protein and protecting from degradation. To note, that gL (*UL115*) and *UL116* are adjacent genes on the  
471 same transcription unit and that the two proteins are bona fide synthesized simultaneously. As second  
472 step, UL148 interacts potentially with both gH and UL116 mediating binding to gL, a process that in  
473 absence of UL116 occurs at lower yield. It is possible that the formation of the gH/UL116 dimers  
474 progress while UL148 is involved in interaction with other factors such as the ERAD component Sel1L  
475 (36) while in its absence gH/UL116 dimer formation is favored. In absence of UL148, the heterodimer  
476 gH/UL116 is more stable and reduce the formation of gH/gL accessible for Trimer but especially for  
477 Pentamer assemble. Two disulfide bonds lock gL to gH and an additional cysteine on gL establish an  
478 alternative disulfide bridge to gO or UL128/UL130/UL131A resulting into the trimeric or pentameric  
479 complex respectively (22, 39). Thus, the noncovalent nature of gH/UL116 binding is ideal to chaperon  
480 gH toward a native or near-native conformation inducing stable conformer able to avoid host ERAD but  
481 also to be conformational competent to bind gL. Conformational instability of gH in absence of UL116  
482 would explain why the levels of both the Trimer and Pentamer were lowered in *UL116*-null virions.  
483 UL148 would act downstream of UL116 as a regulatory factor acting on gH to favor gO incorporation  
484 on gH/gL. The role of US16 could be to stabilize the UL128/130/131A making this trimer available for  
485 incorporation. Although possible, any interaction between UL148 and US16 remains hypothetical. A  
486 further level of regulation can be hypothesized looking at the topology of US16 from Merlin (uniport  
487 Q6SVZ0). The cytoplasmic C-terminal of US16 has 43 residues with 9 serines and 3 threonines that  
488 are putative sites of phosphorylation. Apart for the numerous kinases that could mediate ser/thr  
489 phosphorylation, the UL148 protein has been shown to activate the unfolding protein response (UPR)  
490 including the protein kinase R (PKR)-like ER kinase (PERK). PERK is a ser/thr kinase acting on  
491 restricted substrates (40) that is known to mediate efficient HCMV replication (41). Although this  
492 possibility is purely hypothetical, other 7TM protein of the early secretory pathway have been found to  
493 be regulated by cytoplasmic tail phosphorylation. For example, serine phosphorylation of the KDEL  
494 receptor by protein kinase A (PKA) is a crucial step in the regulation of the retrograde trafficking from  
495 Golgi to ER-Golgi (42). Intriguingly, the HCMV US17 gene product, known as interfering with the host  
496 innate immunoresponse, seems to play a role in controlling the viral level of gH. Guerzsinky et al. have  
497 shown that the reconstituted AD169 knocked out of the US17 gene show about 3 times reduction of viral  
498 gH without impairment of fibroblasts infectivity (43). In common with UL148, US17 interferes with the  
499 ER stress response inducing aberrant expression of several genes of this pathway. However, no data are  
500 available on a direct binding of this protein to gH and the observed reduction of gH levels in the US17  
501 knock-out mutant could be an indirect effect such as an altered trafficking to the assembly complex (43).

502 In common with UL148 and US16, UL116 is also a nonessential viral protein (31, 32), highly  
503 conserved among strains that may suggest multiple interaction with other host and viral proteins (44).  
504 Our findings demonstrate that UL116 is required for reaching wt levels of both gH-based complexes but  
505 more generally of the viral particles' levels of gH. Remarkably, in the *UL116*-null virus non disulfide  
506 bond gH in viral particles was completely missing and intracellular amount drastically reduced likely  
507 due to accelerate gH degradation. The presence of noncovalently linked gH was firstly revealed by Britt  
508 and collaborators while they identified a gp125 glycoprotein, then named gO, as part of gH/gL complex  
509 (45). Additionally, early characterization of the Pentamer by Wang and Shenk, preliminary described as  
510 gH/gL/UL128/UL130 complex, revealed a huge amount of noncovalently linked gH in infected cells  
511 (46). In this work we show that this fraction corresponds to gH associated to UL116 that, in addition,  
512 roughly represent the major gH complex carried by virions at least in TR. Indeed, in absence of UL148,  
513 the amount of gH/UL116 dimer further increases on viral particles as well as intracellularly. The direct  
514 interaction between UL148 and UL116 shown here suggests that the two proteins compete for gH  
515 association and that the formation of the disulfide bonds with gL is induced by UL148. Altogether,  
516 UL116 is a newly identified player of the molecular machinery responsible for the efficient folding and  
517 incorporation of gH-based complexes into virions

518 As UL116 protects gH from degradation in the ER, its meets the definition of molecular  
519 chaperone/escort as “any protein that interacts with and aids in the folding or assembly of another  
520 protein” and increase the yield of its client(s) (47). It would be also interesting to define the association  
521 of HCMV glycoproteins and folding assisting factors with ER cellular chaperones and/or other host  
522 proteins. A difference in the cell type host factors interacting with this machinery could explain why the  
523 levels of cellular pools of complexes are different between HFF and ARPE-19 cells. The best documented  
524 example of host contribution to the switch of envelope glycoproteins composition comes from the  
525 gammaherpesvirus EBV the infection of which is mainly restricted to B and epithelial cells. The gH/gL  
526 accessory protein gp42 is retained into the ER by the class II HLA, its receptor on B-cells, generating a  
527 progeny of gH/gL carrying virions with epithelial cells tropism (reviewed in (48)). In this case, the same  
528 host protein acts as receptor on B-cells for viral entry and as ER retaining factor for the viral ligand in  
529 the same cell type. For HCMV structural proteins such kind of analysis has not been performed yet.  
530 However, a molecular chaperone is not part of the final complex (47) while UL116 heterodimerizes with  
531 gH and is found on the viral envelope (21). This virion complex is massively represented on virions and  
532 could have irrelevant functions for HCMV pathogenesis as well as perform a still unnoticed role. The  
533 reduction of about 10-times cell-free viral infection in fibroblasts was reminiscent of adhesion factors  
534 from other *herpesviridae*. For instance, HSV gC protein acts as a “tethering” factor targeting  
535 glycosaminoglycans (GAGs) on cells (49) or the very abundant EBV gp350/220 glycoprotein that binds  
536 CD35 on host cells (50). These viral proteins are nonessential for entry, but they increase about 10-times  
537 viral cell-free infectivity. The experiments we have performed was not suitable to reveal eventual low  
538 affinity binding and we cannot exclude that a similar function belongs to gH/UL116. Further studies are  
539 required to dissect the function role of envelope UL116.

540

541

## 542 **Acknowledgments**

543 We are in debt with Dr. Jeremy Kamil (LSU) for the fruitful discussion on UL148 and UL116 and Dr.  
544 Adam Feire (NIBR) for the generous gift of anti-gH MSL-109 antibody. We thank Simona Tavarini and  
545 Chiara Sammiceli (GSK) for FACS assistance.

546

547 **Funding**

548 This study was entirely sponsored by GSK Vaccines. GSK took responsibility for all costs incurred in  
549 publishing.

550 **Conflict of interest**

551 All authors have declared the following interests. DY, SC, EF and DM are employees of GSK. DY and  
552 DM report ownership of GSK shares and/or restricted GSK shares. GV and DA are or were PhD students  
553 sponsored by GSK Vaccines. MM is an employee of the University of Naples Federico II with a  
554 consultancy contract with GSK.

555 **Contributorship**

556 DY, SC, DM, and MM were involved in the conception and design of the study. GV, DA acquired the  
557 data. GV, DA, EF, DM, and MM analyzed and interpreted the results. All authors were involved in  
558 drafting the manuscript or revising it critically for important intellectual content. All authors had full  
559 access to the data and approved the manuscript before it was submitted by the corresponding author.

560

561

## REFERENCES

562

- 563 1. Mocarski ES, Shenk T, Pass RF. 2013. Cytomegaloviruses. In: Knipe DM, Howley PM, Fields Virology.  
564 Wolters Kluwer, Lippincott Williams & Wilkins.
- 565 2. Collins-McMillen D, Buehler J, Peppenelli M, Goodrum F. 2018. Molecular Determinants and the  
566 Regulation of Human Cytomegalovirus Latency and Reactivation. *Viruses* 10.
- 567 3. Zhuravskaya T, Maciejewski JP, Netski DM, Bruening E, Mackintosh FR, St Jeor S. 1997. Spread of  
568 human cytomegalovirus (HCMV) after infection of human hematopoietic progenitor cells: model of  
569 HCMV latency. *Blood* 90:2482-91.
- 570 4. Styczynski J. 2018. Who Is the Patient at Risk of CMV Recurrence: A Review of the Current Scientific  
571 Evidence with a Focus on Hematopoietic Cell Transplantation. *Infect Dis Ther* 7:1-16.
- 572 5. Streblov DN, Dumortier J, Moses AV, Orloff SL, Nelson JA. 2008. Mechanisms of cytomegalovirus-  
573 accelerated vascular disease: induction of paracrine factors that promote angiogenesis and wound  
574 healing. *Curr Top Microbiol Immunol* 325:397-415.
- 575 6. Boppana SB, Ross SA, Fowler KB. 2013. Congenital cytomegalovirus infection: clinical outcome. *Clin*  
576 *Infect Dis* 57 Suppl 4:S178-81.
- 577 7. Sinzger C, Digel M, Jahn G. 2008. Cytomegalovirus cell tropism. *Curr Top Microbiol Immunol* 325:63-83.
- 578 8. Heldwein EE, Krummenacher C. 2008. Entry of herpesviruses into mammalian cells. *Cell Mol Life Sci*  
579 65:1653-68.
- 580 9. Zhou M, Yu Q, Wechsler A, Ryckman BJ. 2013. Comparative analysis of gO isoforms reveals that strains  
581 of human cytomegalovirus differ in the ratio of gH/gL/gO and gH/gL/UL128-131 in the virion envelope.  
582 *J Virol* 87:9680-90.
- 583 10. Ryckman BJ, Rainish BL, Chase MC, Borton JA, Nelson JA, Jarvis MA, Johnson DC. 2008. Characterization  
584 of the human cytomegalovirus gH/gL/UL128-131 complex that mediates entry into epithelial and  
585 endothelial cells. *J Virol* 82:60-70.
- 586 11. Huber MT, Compton T. 1997. Characterization of a novel third member of the human cytomegalovirus  
587 glycoprotein H-glycoprotein L complex. *J Virol* 71:5391-8.
- 588 12. Zhou M, Lanchy JM, Ryckman BJ. 2015. Human Cytomegalovirus gH/gL/gO Promotes the Fusion Step of  
589 Entry into All Cell Types, whereas gH/gL/UL128-131 Broadens Virus Tropism through a Distinct  
590 Mechanism. *J Virol* 89:8999-9009.
- 591 13. Kabanova A, Marcandalli J, Zhou T, Bianchi S, Baxa U, Tsybovsky Y, Lilleri D, Silacci-Fregni C, Foglierini  
592 M, Fernandez-Rodriguez BM, Druz A, Zhang B, Geiger R, Pagani M, Sallusto F, Kwong PD, Corti D,  
593 Lanzavecchia A, Perez L. 2016. Platelet-derived growth factor- $\alpha$  receptor is the cellular receptor for  
594 human cytomegalovirus gHgLgO trimer. *Nat Microbiol* 1:16082.
- 595 14. Wu Y, Prager A, Boos S, Resch M, Brizic I, Mach M, Wildner S, Scrivano L, Adler B. 2017. Human  
596 cytomegalovirus glycoprotein complex gH/gL/gO uses PDGFR- $\alpha$  as a key for entry. *PLoS Pathog*  
597 13:e1006281.
- 598 15. Wu K, Oberstein A, Wang W, Shenk T. 2018. Role of PDGF receptor- $\alpha$  during human  
599 cytomegalovirus entry into fibroblasts. *Proc Natl Acad Sci U S A* 115:E9889-E9898.
- 600 16. Martinez-Martin N, Marcandalli J, Huang CS, Arthur CP, Perotti M, Foglierini M, Ho H, Dosey AM,  
601 Shriver S, Payandeh J, Leitner A, Lanzavecchia A, Perez L, Ciferri C. 2018. An Unbiased Screen for  
602 Human Cytomegalovirus Identifies Neuropilin-2 as a Central Viral Receptor. *Cell* 174:1158-1171 e19.
- 603 17. E X, Meraner P, Lu P, Perreira JM, Aker AM, McDougall WM, Zhuge R, Chan GC, Gerstein RM, Caposio P,  
604 Yurochko AD, Brass AL, Kowalik TF. 2019. OR1411 is a receptor for the human cytomegalovirus  
605 pentameric complex and defines viral epithelial cell tropism. *Proc Natl Acad Sci U S A* 116:7043-7052.

- 606 18. Zhang L, Zhou M, Stanton R, Kamil J, Ryckman BJ. 2018. Expression Levels of Glycoprotein O (gO) Vary  
607 between Strains of Human Cytomegalovirus, Influencing the Assembly of gH/gL Complexes and Virion  
608 Infectivity. *J Virol* 92.
- 609 19. Li G, Nguyen CC, Ryckman BJ, Britt WJ, Kamil JP. 2015. A viral regulator of glycoprotein complexes  
610 contributes to human cytomegalovirus cell tropism. *Proc Natl Acad Sci U S A* 112:4471-6.
- 611 20. Lukanini A, Cavaletto N, Raimondo S, Geuna S, Gribaudo G. 2017. Loss of the Human Cytomegalovirus  
612 US16 Protein Abrogates Virus Entry into Endothelial and Epithelial Cells by Reducing the Virion Content  
613 of the Pentamer. *J Virol* 91.
- 614 21. Calo S, Cortese M, Ciferri C, Bruno L, Gerrein R, Benucci B, Monda G, Gentile M, Kessler T, Uematsu Y,  
615 Maione D, Lilja AE, Carfi A, Merola M. 2016. The Human Cytomegalovirus UL116 Gene Encodes an  
616 Envelope Glycoprotein Forming a Complex with gH Independently from gL. *J Virol* 90:4926-38.
- 617 22. Ciferri C, Chandramouli S, Donnarumma D, Nikitin PA, Cianfrocco MA, Gerrein R, Feire AL, Barnett SW,  
618 Lilja AE, Rappuoli R, Norais N, Settembre EC, Carfi A. 2015. Structural and biochemical studies of HCMV  
619 gH/gL/gO and Pentamer reveal mutually exclusive cell entry complexes. *Proc Natl Acad Sci U S A*  
620 112:1767-72.
- 621 23. Murphy E, Yu D, Grimwood J, Schmutz J, Dickson M, Jarvis MA, Hahn G, Nelson JA, Myers RM, Shenk  
622 TE. 2003. Coding potential of laboratory and clinical strains of human cytomegalovirus. *Proc Natl Acad Sci U S A* 100:14976-81.
- 624 24. Smith IL, Taskintuna I, Rahhal FM, Powell HC, Ai E, Mueller AJ, Spector SA, Freeman WR. 1998. Clinical  
625 failure of CMV retinitis with intravitreal cidofovir is associated with antiviral resistance. *Arch*  
626 *Ophthalmol* 116:178-85.
- 627 25. Britt W. 2010. Human Cytomegalovirus: Propagation, quantification and storage. *Current Protocols in*  
628 *Microbiology* 14E.3.
- 629 26. Tischer BK, von Einem J, Kaufer B, Osterrieder N. 2006. Two-step red-mediated recombination for  
630 versatile high-efficiency markerless DNA manipulation in *Escherichia coli*. *Biotechniques* 40:191-7.
- 631 27. Tischer BK, Smith GA, Osterrieder N. 2010. En passant mutagenesis: a two step markerless red  
632 recombination system. *Methods Mol Biol* 634:421-30.
- 633 28. Baldick CJ, Jr., Marchini A, Patterson CE, Shenk T. 1997. Human cytomegalovirus tegument protein  
634 pp71 (ppUL82) enhances the infectivity of viral DNA and accelerates the infectious cycle. *J Virol*  
635 71:4400-8.
- 636 29. Tischer BK, Von Einem J, Kaufer B, Osterrieder N. 2006. Two-step Red-mediated recombination for  
637 versatile high-efficiency markerless DNA manipulation in *Escherichia coli*. *Biotechniques* 40:191-197.
- 638 30. Wang F, Song W, Brancati G, Segatori L. 2011. Inhibition of endoplasmic reticulum-associated  
639 degradation rescues native folding in loss of function protein misfolding diseases. *J Biol Chem*  
640 286:43454-64.
- 641 31. Yu D, Silva MC, Shenk T. 2003. Functional map of human cytomegalovirus AD169 defined by global  
642 mutational analysis. *Proc Natl Acad Sci U S A* 100:12396-401.
- 643 32. Dunn W, Chou C, Li H, Hai R, Patterson D, Stolc V, Zhu H, Liu F. 2003. Functional profiling of a human  
644 cytomegalovirus genome. *Proc Natl Acad Sci U S A* 100:14223-8.
- 645 33. Day LZ, Stegmann C, Schultz EP, Lanchy JM, Yu Q, Ryckman BJ. 2020. Polymorphisms in Human  
646 Cytomegalovirus gO Exert Epistatic Influences on Cell-Free and Cell-To-Cell Spread, and Antibody  
647 Neutralization on gH Epitopes. *J Virol* doi:10.1128/JVI.02051-19.
- 648 34. Stanton RJ, Baluchova K, Dargan DJ, Cunningham C, Sheehy O, Seirafian S, McSharry BP, Neale ML,  
649 Davies JA, Tomasec P, Davison AJ, Wilkinson GWG. 2010. Reconstruction of the complete human  
650 cytomegalovirus genome in a BAC reveals RL13 to be a potent inhibitor of replication. *The Journal of*  
651 *Clinical Investigation* 120:3191-3208.
- 652 35. Schultz EP, Lanchy JM, Day LZ, Yu Q, Peterson C, Preece J, Ryckman BJ. 2020. Specialization for Cell-Free  
653 or Cell-to-Cell Spread of BAC-Cloned Human Cytomegalovirus Strains Is Determined by Factors beyond  
654 the UL128-131 and RL13 Loci. *J Virol* 94.



- 655 36. Nguyen CC, Siddiquey MNA, Zhang H, Li G, Kamil JP. 2018. Human Cytomegalovirus Tropism Modulator  
656 UL148 Interacts with SEL1L, a Cellular Factor That Governs Endoplasmic Reticulum-Associated  
657 Degradation of the Viral Envelope Glycoprotein gO. *J Virol* 92.
- 658 37. Siddiquey MNA, Zhang H, Nguyen CC, Domma AJ, Kamil JP. 2018. The Human Cytomegalovirus  
659 Endoplasmic Reticulum-Resident Glycoprotein UL148 Activates the Unfolded Protein Response. *J Virol*  
660 92.
- 661 38. Bronzini M, Luganini A, Dell'Oste V, De Andrea M, Landolfo S, Gribaudo G. 2012. The US16 gene of  
662 human cytomegalovirus is required for efficient viral infection of endothelial and epithelial cells. *J Virol*  
663 86:6875-88.
- 664 39. Chandramouli S, Malito E, Nguyen T, Luisi K, Donnarumma D, Xing Y, Norais N, Yu D, Carfi A. 2017.  
665 Structural basis for potent antibody-mediated neutralization of human cytomegalovirus. *Sci Immunol* 2.
- 666 40. Pytel D, Majsterek I, Diehl JA. 2016. Tumor progression and the different faces of the PERK kinase.  
667 *Oncogene* 35:1207-15.
- 668 41. Yu Y, Pierciey FJ, Jr., Maguire TG, Alwine JC. 2013. PKR-like endoplasmic reticulum kinase is necessary  
669 for lipogenic activation during HCMV infection. *PLoS Pathog* 9:e1003266.
- 670 42. Cabrera M, Muniz M, Hidalgo J, Vega L, Martin ME, Velasco A. 2003. The retrieval function of the KDEL  
671 receptor requires PKA phosphorylation of its C-terminus. *Mol Biol Cell* 14:4114-25.
- 672 43. Gurczynski SJ, Das S, Pellett PE. 2014. Deletion of the human cytomegalovirus US17 gene increases the  
673 ratio of genomes per infectious unit and alters regulation of immune and endoplasmic reticulum stress  
674 response genes at early and late times after infection. *J Virol* 88:2168-82.
- 675 44. Foglierini M, Marcandalli J, Perez L. 2019. HCMV Envelope Glycoprotein Diversity Demystified. *Front*  
676 *Microbiol* 10:1005.
- 677 45. Li L, Nelson JA, Britt WJ. 1997. Glycoprotein H-related complexes of human cytomegalovirus:  
678 identification of a third protein in the gCIII complex. *J Virol* 71:3090-7.
- 679 46. Wang D, Shenk T. 2005. Human cytomegalovirus virion protein complex required for epithelial and  
680 endothelial cell tropism. *Proc Natl Acad Sci U S A* 102:18153-8.
- 681 47. Kim YE, Hipp MS, Bracher A, Hayer-Hartl M, Hartl FU. 2013. Molecular chaperone functions in protein  
682 folding and proteostasis. *Annu Rev Biochem* 82:323-55.
- 683 48. Mohl BS, Chen J, Sathiyamoorthy K, Jardetzky TS, Longnecker R. 2016. Structural and Mechanistic  
684 Insights into the Tropism of Epstein-Barr Virus. *Mol Cells* 39:286-91.
- 685 49. Herold BC, WuDunn D, Soltys N, Spear PG. 1991. Glycoprotein C of herpes simplex virus type 1 plays a  
686 principal role in the adsorption of virus to cells and in infectivity. *J Virol* 65:1090-8.
- 687 50. Ogembo JG, Kannan L, Ghiran I, Nicholson-Weller A, Finberg RW, Tsokos GC, Fingerroth JD. 2013.  
688 Human complement receptor type 1/CD35 is an Epstein-Barr Virus receptor. *Cell Rep* 3:371-85.

689

690

691

692

## Legends to figures

693

### 694 **Figure 1. Schematic representation of recombinant HCMV mutants generated.**

695 Each mutant is generated through the BAC Mutagenesis Technique. The backbone sequence, common  
696 for each mutant shown, consists of the HCMV TR-wt strain cloned into a BAC and containing a GFP  
697 CDS insertion, under control of an Immediate Early CMV promoter, in an intergenic region between  
698 US32 e US33A genes (BAC-TRG). The TRG-*UL116*-null clone was generated using the BAC-TRG as  
699 template with a single nucleotide insertion in the CDS (between nucleotides in position 4-5) of the *UL116*  
700 gene causing a frameshift and a STOP codon formation. The TRG-UL148-myc clone was generated  
701 using the BAC-TRG as template inserting the sequence encoding for a myc-tag in frame at Carboxy  
702 terminal. The TRG-*UL148*-null clone was generated from the BAC-TRG-UL148-myc by mutation of  
703 the codon at position 4 into a STOP codon. Reconstitutions of the infectious viruses was performed as  
704 detailed in M&M. Yellow stars indicate the approximative position of the stop codon insertion.

705

706

### 707 **Figure 2. Growth curve of TRG, TRG-UL116null and TRG-UL148null and binding of** 708 **recombinant gH/UL116 to HFF-1 and ARPE-19**

709 **A)** HFF-1 cells were infected at MOI 1 and cultured for 7 days. At the indicated times, aliquot of the  
710 medium were withdrawal and viral titer assessed on fibroblasts. **B)** ARPE-19 cells were infected at MOI  
711 5 and cultured for 8 days. At the indicated times, aliquot of the medium were withdrawal and viral titer  
712 assessed on fibroblasts. **C)** 200 µg/ml of recombinant gH/UL116, Trimer and Pentamer were incubated  
713 for 1 hr with 10<sup>5</sup> cells in blocking buffer (PBS with 1% BSA). His tag was present on recombinant gH.  
714 HIS-Tag Monoclonal Antibody [HIS.H8] and then Alexa Fluor 647-conjugated anti-mouse secondary  
715 antibody were used to reveal complexes bound to cells. A total of 10<sup>5</sup> cells were analyzed for each  
716 histogram using FACS BD Canto II (Becton Dickinson, Heidelberg, Germany).

717

### 718 **Figure 3. Loss of *UL116* or *UL148* gene products alters the ratio of gH/gL complexes in HFF-1** 719 **cellular extracts and virions.**

720 *UL116* and GAPDH were revealed in reducing conditions. gH, gH/gL/gO, gH/gL/UL128 were probed  
721 with anti-Pentamer polyclonal antibodies in nonreducing conditions. Western blots showed are  
722 representative of at least three independent experiments. On the bottom, densitometric analysis of the  
723 corresponding immunoblot are shown. Densitometric values of complexes present in the wt virus are  
724 considered 100%. The standard deviation indicated in graphs were obtained by the densitometric values  
725 from three independent experiments and normalized on the intensity of the pp65 viral marker. Viruses  
726 used for infection are indicated on the top of each lane. **A)** Viral pellets from a 75 cm<sup>2</sup> flasks for each  
727 sample were lysed in 50 µl of 1% Triton X-110 in PBS. 5 µl aliquots were runned in SDS-PAGE in  
728 reducing conditions, transfered to a nitrocellulose membrane and probed with anti-pp65 whose levels

729 were used to normalized the consecutive loads. Two aliquots of each sample were then loaded on 4-12%  
730 PAGE-SDS in reducing and nonreducing conditions respectively and treated for immunoblotting. Virus  
731 lysates are indicated on the top of each lane **B**) Equal amount of total proteins (BCA) from 7 DPI whole  
732 cell lysates (WCL) of HFF-1 were separated (NuPage, Invitrogen) and treated for western blot analysis.

733

734 **Figure 4. Loss of *UL116* or *UL148* gene products alters the ratio of gH/gL complexes in ARPE-19**  
735 **cellular extracts and virions.**

736 Analysis was performed as specified in the legend of figure 3. Viruses used for infection are indicated  
737 on the top of each lane. **A**) Immunoblots of lysates of sucrose cushion-purified virions (8 DPI) **B**) Equal  
738 amount of total proteins (quantified by BCA) from 8 DPI whole cell lysates (WCL) of ARPE-19 infected  
739 with the viruses indicated on the top of the figure were separated on 4-12% PAGE-SDS (NuPage,  
740 Invitrogen) and treated for western blot analysis.

741

742 **Figure 5. Free-gH levels in WCL from HFF cells infected with TRG and TRG-*UL116*-null under**  
743 **kifunesine treatment.**

744 HFF-1 cells were infected in duplicate with TRG wt and TRG-*UL116*-null and incubated 72 hrs. At the  
745 end of this period, 5  $\mu$ M Kifunesine was added to one of the pair cultures and incubated for additional  
746 48 hrs. Cells were then harvested, lysed and WCLs were treated for western blot analysis in both reducing  
747 (lanes 1-6) and nonreducing conditions (lanes 7-12). Non infected cells were treated identically and used  
748 as control. Protein separation was achieved on 4-12% NuSieve gels (Invitrogen) using equal amount of  
749 total protein (BCA). Rabbit polyclonal anti-Trimer was used to detect gH. Intensity of the GAPDH bands  
750 were used to normalize values reported on the graph.

751

752 **Figure 6. Co-immunoprecipitations of WCL from HFF cells infected with TRG, TRG-*UL148*myc**  
753 **and TRG-*UL148*-null.**

754 HFF-1 cells were infected for 6-days at MOI 1 with TRG, TRG-*UL148*myc and TRG-*UL148*-null.  
755 Infected and non-infected cell lysates were immunoprecipitated with beads only (lanes 1, 5 and 9) , Anti-  
756 *UL116* (H4) (lanes 2, 6 and 10), anti-myc (lanes 3, 7 and 11) and anti-gH (MSL-109) (lanes 4, 8 and 12)  
757 as indicated on the top of the lanes. Protein separation was achieved on 4-12% NuSieve gels (Invitrogen)  
758 and probed in western blot by anti-His, anti-myc and mAb F11 for gH, *UL148* and *UL116* respectively  
759 (indicated on the right). GAPDH was used as marker to normalize lysate amount and to exclude  
760 contamination in Immunoprecipitations. Input lysates (lanes 13-16) were also probed for detection of the  
761 individual HCMV proteins.

762

763 **Figure 7. Co-immunoprecipitaions from transfected cells.**

764 pCDNA3.1(-)-gH\_myc, pCDNA3.1(-)-UL116\_strep and pCDNA3.1(-)-UL148\_mycHis were used to  
765 transiently transfect HEK-293T cells, either alone or in combination to each other as specified on the top  
766 of the figure. pCDNA3.1(-) was used as control (lanes 8, 16 and 24). 48 hrs after transfection, cells were  
767 collected and the cleared lysates split in two aliquots for immunoprecipitation with anti-gH (human  
768 monoclonal MSL-109 antibody) and anti-UL148 (rabbit anti-His). UL-116 was revealed by the mouse  
769 monoclonal F11 antibody while anti-myc (mouse monoclonal) was used as probe to reveal gH-myc and  
770 UL148\_mycHis. The western blot is representative of three independent experiments.

771

772 **Figure 8. Model of HCMV interaction in the early phases of gH complexes assembly**

773 UL116 is the first interactor of gH and chaperones the early folding steps. UL148 is recruited through  
774 either gH or UL116 and favors the binding of gL and successive association of gO. At limiting  
775 availability of UL148, for example engaged by Ssl1A, UL116 remains bound to gH and traffic through  
776 the secretory pathway reaching the assembly complex and then the mature virion. UL116 can also be  
777 released from gH in absence of UL148, either at low efficiency or by the intervention of US16 or an  
778 unknown factor, allowing gL binding and favoring further incorporation of UL128-131 versus gO.  
779 Interaction of US16 with the other HCMV proteins is merely speculative.

780

Figure 1

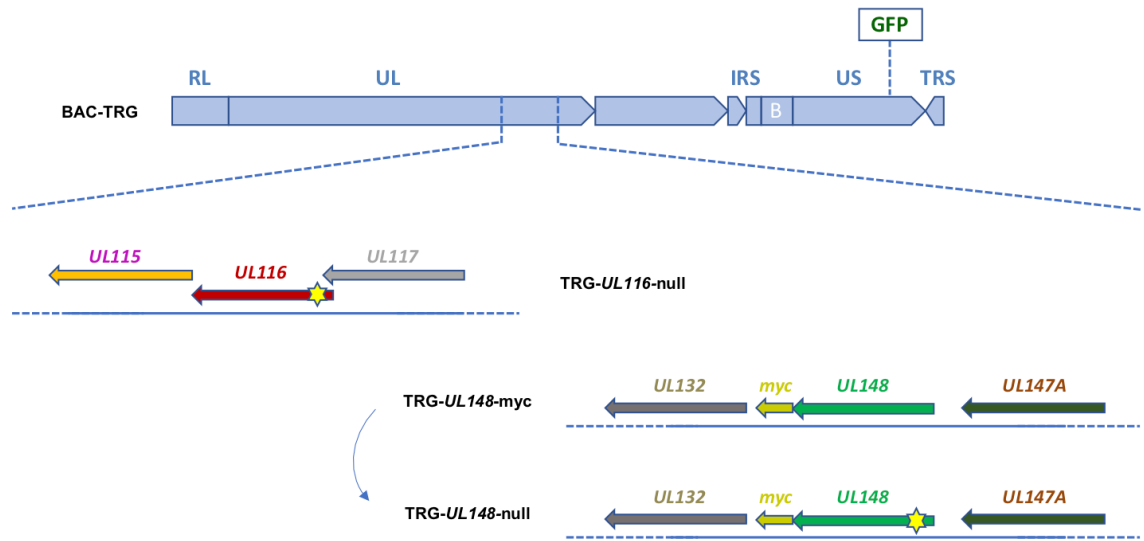

781

Figure 2

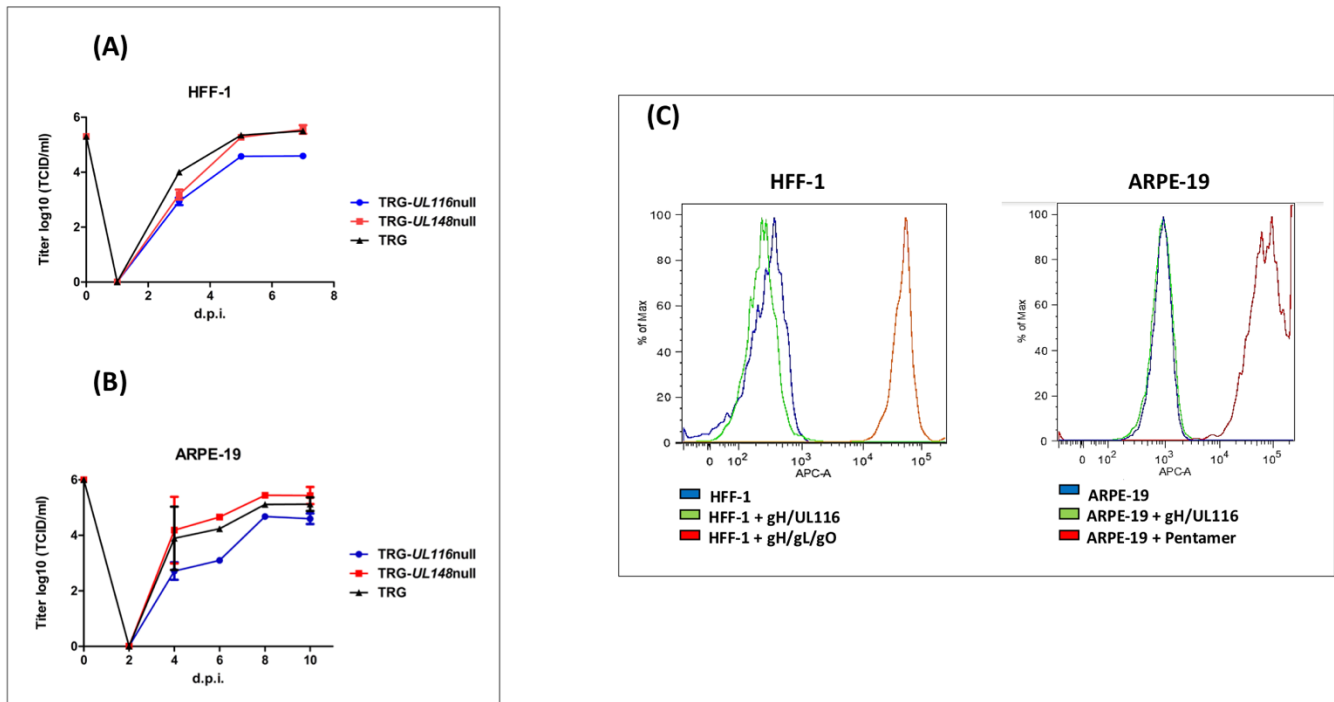

782

**Figure 3**

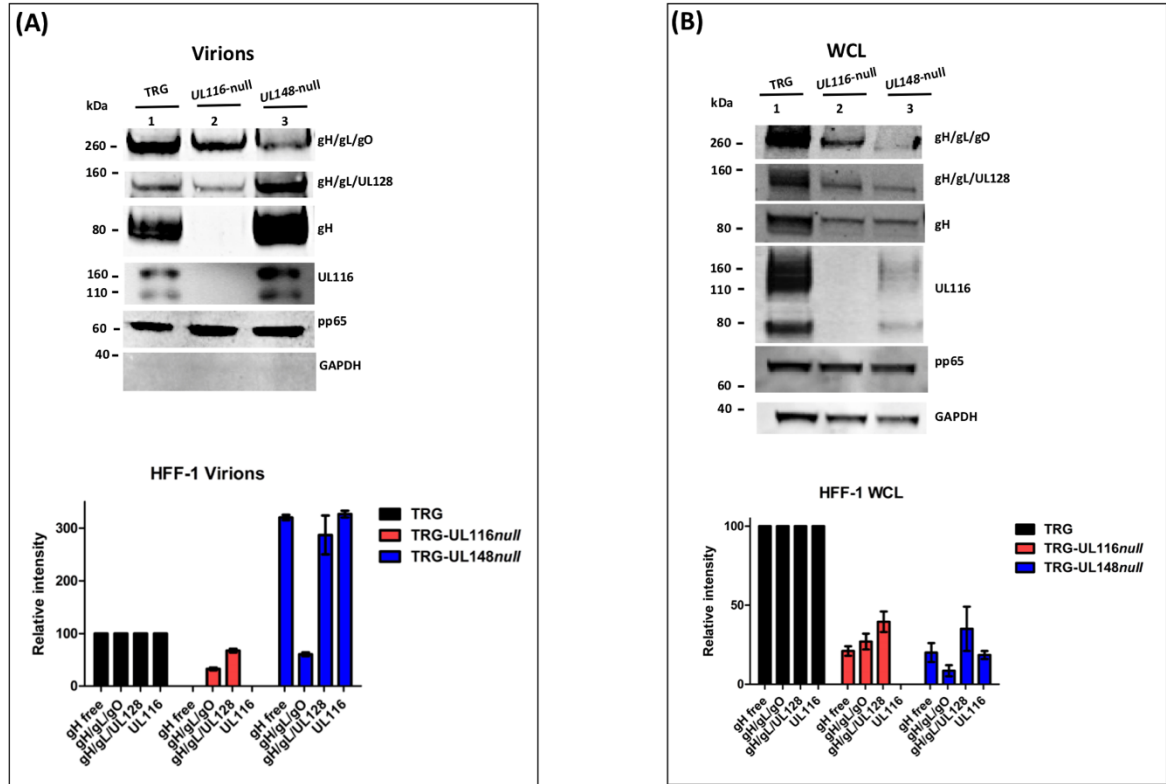

783

Figure 4

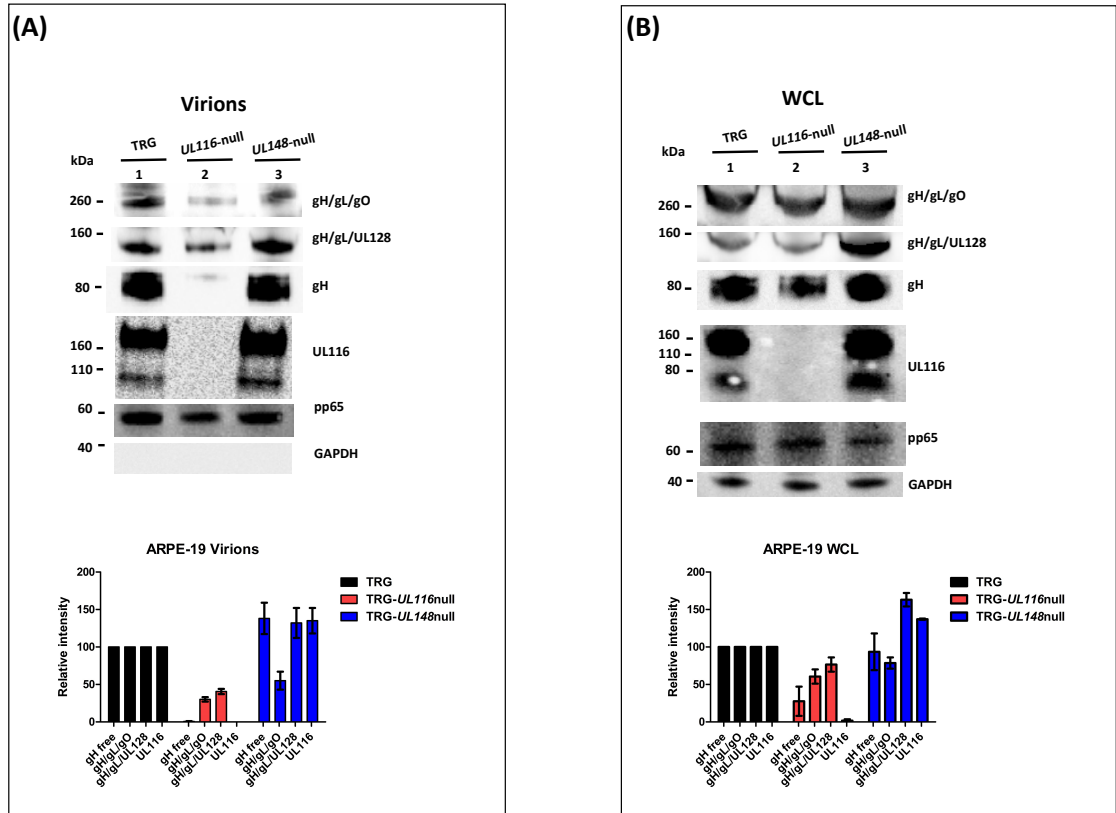

784



**Figure 5**

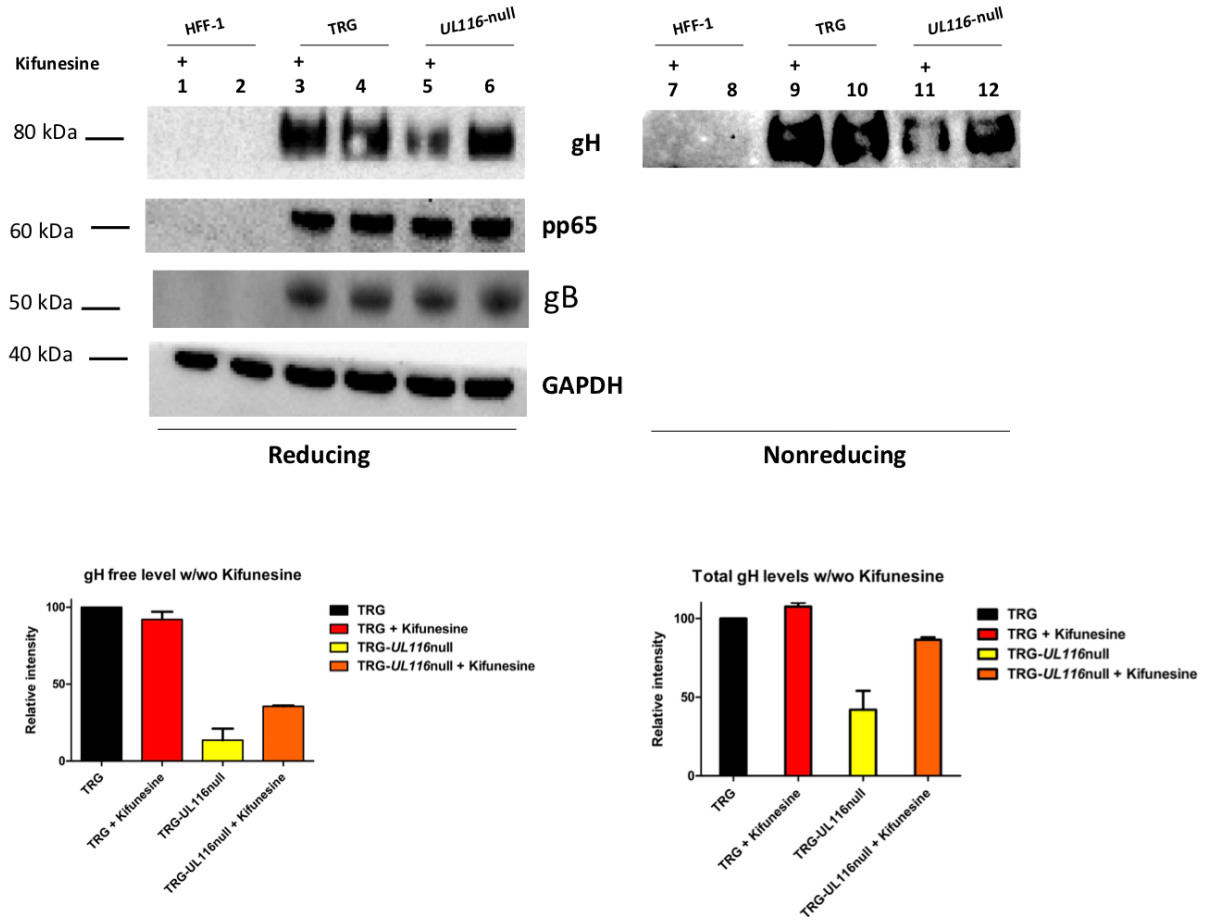

785

**Figure 6**

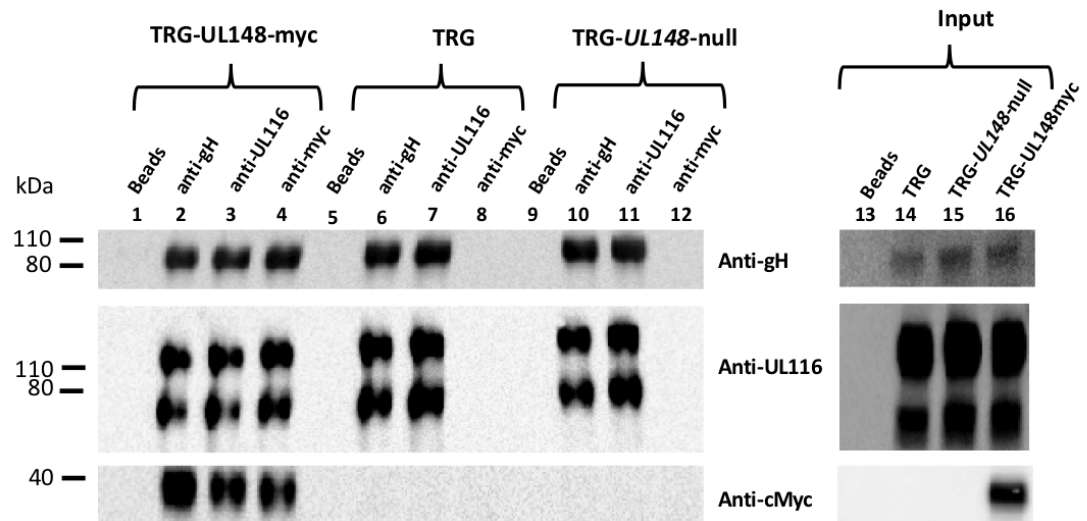

786

**Figure 7**

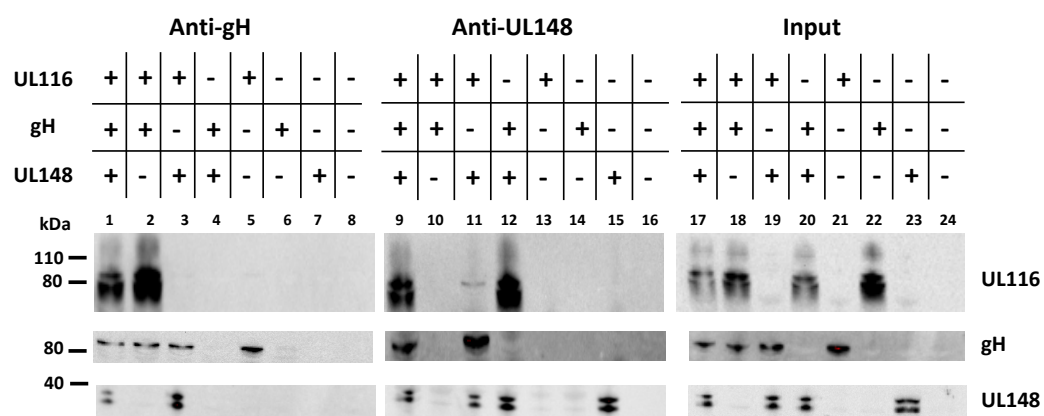

787

Figure 8

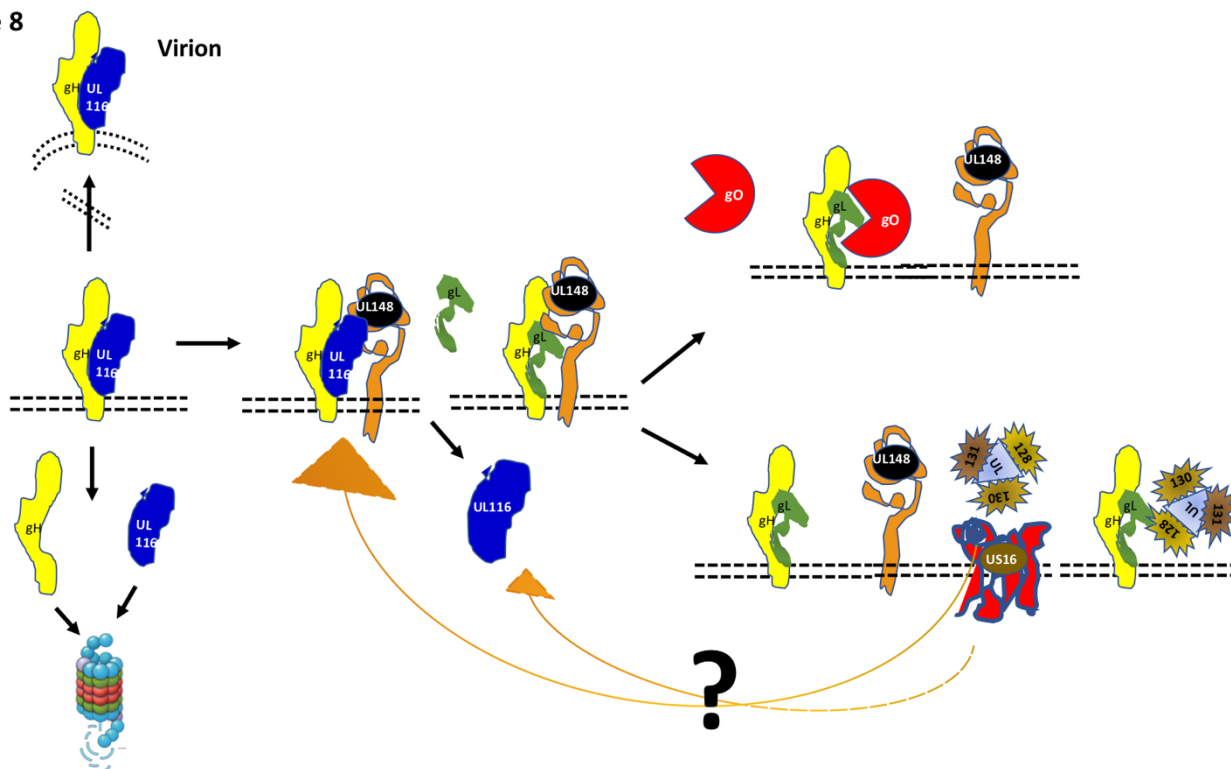

788

789 **Table 1 Oligonucleotides and synthetic DNA used in this study.**

| Name               | Sequence (5' to 3')                                                                                                                                                                                                                                                                                                                                                                                                                                                                                                                                                                                                                                                                                                                                                                                                                                                                                                                                                                                                                                                                                                                                                                                                   |
|--------------------|-----------------------------------------------------------------------------------------------------------------------------------------------------------------------------------------------------------------------------------------------------------------------------------------------------------------------------------------------------------------------------------------------------------------------------------------------------------------------------------------------------------------------------------------------------------------------------------------------------------------------------------------------------------------------------------------------------------------------------------------------------------------------------------------------------------------------------------------------------------------------------------------------------------------------------------------------------------------------------------------------------------------------------------------------------------------------------------------------------------------------------------------------------------------------------------------------------------------------|
| UL148_BACnull_Fw   | GGGCGGTGGCCGGCACGCCGATTTTCCTAACCCGCGCAGCATGTTGCGCTAACTGTTTCAC<br>GCTAGGGATAACAGGGTAATCGAT                                                                                                                                                                                                                                                                                                                                                                                                                                                                                                                                                                                                                                                                                                                                                                                                                                                                                                                                                                                                                                                                                                                             |
| UL148_BACnull_Rv   | CTAGCGTTGACAGACGGCCCCGTGGAGGGCCAGTAGGACGAGCGTGAACAGTTAGCGCAAC<br>ATGCCAGTGTACAACCAATTAAC                                                                                                                                                                                                                                                                                                                                                                                                                                                                                                                                                                                                                                                                                                                                                                                                                                                                                                                                                                                                                                                                                                                              |
| Pre_UL148_Scrn_Fw  | CTCCTCATCTTCTGTGGACC                                                                                                                                                                                                                                                                                                                                                                                                                                                                                                                                                                                                                                                                                                                                                                                                                                                                                                                                                                                                                                                                                                                                                                                                  |
| UL148_Nterm_Rv     | ATCGGTAGACCAGAAAGGCG                                                                                                                                                                                                                                                                                                                                                                                                                                                                                                                                                                                                                                                                                                                                                                                                                                                                                                                                                                                                                                                                                                                                                                                                  |
| UL148_BACmyc_Fw    | GGCTCGCGTTTTTCATAACCTACCTGGTGTGCGGGCGTCCGGAACAGAACTGATTAGCGA<br>AGAAGATCTGTAGGGATAACAGGGTAATCGAT                                                                                                                                                                                                                                                                                                                                                                                                                                                                                                                                                                                                                                                                                                                                                                                                                                                                                                                                                                                                                                                                                                                      |
| UL148_BACmyc_Rv    | GAACGACGTGTGACGAGGACGTGGTTTTCCGCAAGCCTCTACAGATCTTCTTCGCTAATCA<br>GTTTCTGTTCCGCGAGTTACAACCAATTAAC                                                                                                                                                                                                                                                                                                                                                                                                                                                                                                                                                                                                                                                                                                                                                                                                                                                                                                                                                                                                                                                                                                                      |
| UL148_Cterm_Fw     | AACGCGCCTGACCCGCGG                                                                                                                                                                                                                                                                                                                                                                                                                                                                                                                                                                                                                                                                                                                                                                                                                                                                                                                                                                                                                                                                                                                                                                                                    |
| Post_UL148_Scrn_Rv | GGTTGTAGGTTTCGCTACTCG                                                                                                                                                                                                                                                                                                                                                                                                                                                                                                                                                                                                                                                                                                                                                                                                                                                                                                                                                                                                                                                                                                                                                                                                 |
| UL116_BACnull_Fw   | ACTTGCCGCTGTACAACGAATTCACCAGCTTTTCGCTGCCACCTCATGATAGCGGCGGC<br>GTAGGGATAACAGGGTAATCGAT                                                                                                                                                                                                                                                                                                                                                                                                                                                                                                                                                                                                                                                                                                                                                                                                                                                                                                                                                                                                                                                                                                                                |
| UL116_BACnull_Rv   | AAAGCACAGAGCCAGGAAAAGCAACCAGCCCCGCCATCGCCGCCCGCTATCATGAGGT<br>GGCCAGTGTACAACCAATTAAC                                                                                                                                                                                                                                                                                                                                                                                                                                                                                                                                                                                                                                                                                                                                                                                                                                                                                                                                                                                                                                                                                                                                  |
| Pre_UL116_Scrn_Fw  | CTGTTTGACGCCGTAACCCTGTGC                                                                                                                                                                                                                                                                                                                                                                                                                                                                                                                                                                                                                                                                                                                                                                                                                                                                                                                                                                                                                                                                                                                                                                                              |
| UL116_Scrn_Rv      | AACCGTGGTGGGAGTGGTGACGG                                                                                                                                                                                                                                                                                                                                                                                                                                                                                                                                                                                                                                                                                                                                                                                                                                                                                                                                                                                                                                                                                                                                                                                               |
| Kan_cassette       | ACTTGCCGCTGTACAACGAATTCACCAGCTTTTCGCTGCCACCTCATGATAGCGGCGGC<br>GTAGGGATAACAGGGTAATCGATTTATTCAACAAAGCCACGTTGTGTCTCAAAATCTCTG<br>ATGTTACATTGCACAAGATAAAAATATATCATCATGAACAATAAACTGTCTGCTTACAT<br>AAACAGTAATAACAAGGGGTGTTATGAGCCATATTCAACGGGAAACGTCTTGCTCGAGGCC<br>GCGATTAATTCACATGGATGCTGATTTATATGGGTATAAATGGGCTCGCGATAATGT<br>CGGGCAATCAGGTGCGACAATCTATCGATTGTATGGGAAGCCCGATGCGCCAGAGTTGTT<br>TCTGAAACATGGCAAAGGTAGCGTTGCCAATGATGTTACAGATGAGATGGTCAGACTAAA<br>CTGGCTGACGGAATTTATGCCTCTTCCGACCATCAAGCATTTTATCCGTACTCCTGATGA<br>TGATGGTTACTCACCCTGCGATCCCCGGGAAAACAGCATTCCAGGTATTAGAAGAATA<br>TCCTGATTCAGGTGAAAATATTGTTGATGCGCTGGCAGTGTTCCTGCGCCGGTTGCATTC<br>GATTCCTGTTTGAATTTGTCCTTTTAAACAGCGATCGCGTATTTTCGTCTCGCTCAGGCGCA<br>ATCACGAATGAATAACGGTTTGGTTGATGCGAGTGATTTTGTGACGAGCGTAATGGCTG<br>GCCTGTTGAACAAGTCTGGAAAGAAATGCATAAGCTTTTGCCATTCTCACCAGGATTCAGT<br>CGTCACTCATGGTGATTTCTCACTTGATAACCTTATTTTTGACGAGGGTGAATTAATAGG<br>TTGTATTGATGTTGGACGAGTCGGAATCGCAGACCGATACCAGGATTTGCCATCCTATG<br>GAACTGCCTCGGTGAGTTTTCTCCTTATTACAGAAACGGCTTTTTCAAAAATATGGTAT<br>TGATAATCCTGATATGAATAAATTGCAGTTTCATTTGATGCTCGATGAGTTTTTCTAATC<br>AGAATTGGTTAATTGGTTGTAACACTGGCCACCTCATGATAGCGGCGGCGGATGGCGG<br>GGCTGGTTGCTTTTCTGGCTCTGTGCTTT |
| gH_12xHis          | ATGAGGCCTGGCCTGCCAGCTATCTGATCATCCTGGCCGTGTGCCTGTTTCAGCCATCTG<br>CTGAGCAGCAGATACGGCGCCGAGGCCGTGTCCGAACCCCTGGATAAGGCCTTCCATCTG<br>CTGCTGAACACCTACGGCAGACCTATCCGGTTCCTGCGCGAGAACACCACCCAGTGCACC<br>TACAACAGCAGCCTGCGGAACAGCACCGTGGTGCAGGAGAATGCCATCAGCTTCAATTTT<br>TTCCAGAGCTACAACAGTACTACGTGTTCCACATGCCCGGTGCCTGTTTGCCGGACCT<br>CTGGCCGAGCAGTTCCTGAACCAGGTGGACCTGACCGAGACACTGGAAAGATAACCAGCAG<br>CGGCTGAATACCTACGCCCTGGTGTCCAAGGACCTGGCCAGCTACAGAAGCTTCAGCCAG<br>CAGCTGAAGGCCCAGGACAGCCTGGGCGAGCAGCCTACAACAGTGCCTCCACCCATCGAC<br>CTGAGCATCCCTCACGTGTGGATGCCTCCCCAGACCACCCCTCACGGCTGGACCGAGTCT<br>CACACAACCAGCGGCCTGCACCGGCCCACTTCAACCAGACCTGCATCTGTTCGACCGC<br>CAGCAGCTGCTGTTTCAGACCCGTGACCCCATGCCTGCACCAGGGCTTCTACCTGATCGAC<br>GAGCTGAGATACGTGAAGATCACCTGACCGAGGATTTCTTCGTGGTTCAGAGTGTCCATC<br>GACGACGACACCCCTATGCTGCTGATCTTCGGCCATCTGCCCGGGTGTGTTCAAGGCC<br>CCTTACCAGCGGGACAACCTTCATCCTGCGGCAGACCGAGAAGCACGAGCTGCTGGTGTG                                                                                                                                                                                                                                                                                              |

|              |                                                                                                                                                                                                                                                                                                                                                                                                                                                                                                                                                                                                                                                                                                                                                                                                                                                                                                                                                                                                                                                                                                                                                                                                                                                                                                                                                                                                                                                                                                                                                                                                                           |
|--------------|---------------------------------------------------------------------------------------------------------------------------------------------------------------------------------------------------------------------------------------------------------------------------------------------------------------------------------------------------------------------------------------------------------------------------------------------------------------------------------------------------------------------------------------------------------------------------------------------------------------------------------------------------------------------------------------------------------------------------------------------------------------------------------------------------------------------------------------------------------------------------------------------------------------------------------------------------------------------------------------------------------------------------------------------------------------------------------------------------------------------------------------------------------------------------------------------------------------------------------------------------------------------------------------------------------------------------------------------------------------------------------------------------------------------------------------------------------------------------------------------------------------------------------------------------------------------------------------------------------------------------|
|              | <p>GTGAAAAAGGACCAGCTGAACCGGCACAGCTACCTGAAGGACCCCGACTTCCTGGAC<del>790</del><br/>GCCCTGGACTTCAACTACCTGGATCTGAGCGCCCTGCTGAGAAACAGCTTCCACAGATAC<br/>GCCGTGGACGTGCTGAAGTCCGGCCGGTGCAGATGCTGGACAGACGGACCGTGGAA<del>791</del><br/>GCCTTCGCCTATGCCCTGGCCCTGTTCCGCCCTGCCAGACAGGAAGAGGCTGGCGCTCAG<br/>GTGTCAGTGGCCAGAGCCCTGGATAGACAGGCCGCCCTGCTGCAGATCCAGGAATTC<del>792</del><br/>ATCACCTGTCTGAGCCAGACCCACCCCGGACCACACTGCTGCTGTACCCTACAGCCGTG<br/>GATCTGGCCAAGCGCGCCCTGTGGACCCCTAACCCAGATCACCGACATCACCAGCCTC<del>793</del><br/>CGCCTGGTGTACATCCTGAGCAAGCAGAACCAGCAGCACCTGATCCCTCAGTGGGCTCTG<br/>CGGCAGATCGCCGACTTTGCCCTGAAGCTGCACAAGACCCATCTGGCCAGCTTTCTGAGC<br/>GCCTTCGCTAGGCAGAACTGTACCTGATGGGCTCCCTGGTGCACCTCATGTCTGGT<del>794</del><br/>ACCACCGAGCGGCGGAGATCTTCATCGTGAAACCGGCCTGTGCAGCCTGGCCGAGCTG<br/>AGCCACTTTACCCAGCTGCTGGCCACCCTCACCACGAGTACCTGAGCGACCTGTACACC<br/>CCTTGCAGCAGCAGCGGCAGACGGGACCACAGCCTGGAACGGCTGACCAGACTGTTCCCT<br/>GATGCCACCGTGCCTGCTACAGTGCCTGCCGCCCTGTCCATCCTGTCCACCATGCAGCCT<br/>AGCACCTGGAAACCTTCCCCGACCTGTTCTGCCTGCCCTGGGCGAGTCTTTTAGCGCC<br/>CTGACCGTGTCCGAGCACGTGTCTACATCGTGACCAACCAGTACCTGATCAAGGGCATC<br/>AGCTACCCCGTGTCCACCACCGTCTGGGACAGAGCCTGATCATCACCCAGACCGACAGC<br/>CAGACCAAGTGCAGCTGACCCGGAACATGCACACCACACACAGCATCACCGTGGCCCTG<br/>AACATCTCCCTGGAAAATTGCGCCTTCTGCCAGTCTGCCCTGCTGGAATACGACGATACC<br/>CAGGGCGTGTATCAACATCATGTACATGCACGACAGCGACGACGTGCTGTTCCGCCCTGGAC<br/>CCCTACAACGAGGTGGTGGTGTCCAGCCCCAGAACCCTACTACCTGATGCTGCTGAAGAAC<br/>GGCACCGTGTGGAAGTGACCGACGTGGTGGTGGATGCCACAGATGGCGGAGGCTCTGGC<br/>GGCGGAAGTGGCGGAGGATCTCACCACCATCACCATCACGGCGGAGGCAGCCATCATCAC<br/>CACCACCATTGA</p> |
| UL148_mycHis | <p>ATGTTGCGCTTGCTGTTACGCTCGTCTACTGGCCCTCCACGGGCGCTGTGCAACGCT<br/>AGCCGCGACTATGTGCATGTTCCGGCTACTGAGCTACCGAGGCGACCCCTGGTCTTCAAG<br/>CACACTTTTTCCGGGTGTGCGTGCACCCCTTACCAGCTAGGCTGGGCTGTGTGTCCGCGAC<br/>TGGGACAGTATGCATTGCACGCTTTCTGGTCTACCGATCTGGAGCAGATGACCCGACTCG<br/>GTGCGACGTTACAGCAGGTGAGCCCCGGGAAGGAGTGACGCTTACAGCTTACAGGAAAC<br/>CAAACCGTACAGCCGTGTTTTAAGCTTTACGTGCCGCTGCAGCTAGAACCCTGGTG<br/>GAAAATGTTGGCCTCTACGTGGCTACGTGGTCAACGACGGTGAACGCCCAACAGTTTT<br/>TTTACACCGCAGGTAGACGTGGTACGCTTTGCTCTATATCTAGAAACGCTCTCCCGGATC<br/>GTGGAACCGTTAGAATCAGGTGCCTGGCAGTGGAAATTTGATACGCTGACCTAGCTCTG<br/>GCGCCCGATTTAGTAAGCAGCCTCTTCGTGGCCGGACACGGCGAGACCGACTTTTACATG<br/>AACTGGACGCTGCGTGCAGTCAGACCCACTACCTGGAGGAGATGGCCTTACAGGTGGAG<br/>ATTCTAAAGCCCCGCGCGTACGTACCCGCGCTATTATCCACCATCCGAAGCTACAGCCG<br/>GGCGTTGGCCTGTGGATAGATTTCTGCGTGTACCGCTACAACGCGCGCCTGACCCGCGGC<br/>TACGTACGATACACCCTGTCACCGAAAGCGCGCTTGCCCGAAAAGCAGAGGGTTGGCTG<br/>GTGTCACTAGACAGATTTCATCGTGCAGTACCTCAACACATTGCTGATTACAATGATGGCG<br/>GCGATATGGGCTCGCGTTTTTCATAACCTACCTGGTGTGCGGGCTCGGGAACAAAACCTC<br/>ATCTCAGAAGAGGATCTGAATATGCATACCGGTTCATCATCACCATCACCATCATCATCAC<br/>CACCATCACTAG</p>                                                                                                                                                                                                                                                                                                                                                                                                                                                                 |
| UL116        | <p>ATGAAACGCCCGCCGCGCTGGCGCGGCTGGCTGCTGTTTCCGGCGCTGTGCTTTTGCCTG<br/>CTGTGCGAAGCGGTGGAAACCAACCGGACCACCGTGACCAGCACCACCGCGGCGGGCG<br/>ACCACCAACACCACCGTGGCGACCACCGGACCACCACCACAGCCCGAACGTGACCAGC<br/>ACCACCAGCAACACCGTGACCACCCGACCACCGTGAGCAGCGTGAGCAACTGACCAGC<br/>AGCACCACCAGCATTCCGATTAGCACCAGCACCCTGAGCGGCACCCGCAACACCGGCAAC<br/>AACAACACCACCACATTGGCACCAACGCGACCAGCCCGAGCCCGAGCGTGAGCATTCTG<br/>ACCACCGTGACCCCGGCGGCGACCAGCACCATTAGCGTGGATGGCGTGGTACCAGCGAGC<br/>GATTATAACCCGACCTTTGATGATCTGGAAAACATTACCACCACCGCGCGCCGACCCGC<br/>CCGCCGGCGCAGGATCTGTGCAGCCATAACCTGAGCATTATTCTGTATGAAGAAGAAAGC<br/>CAGAGCAGCGTGGATATTGCGGTGGATGAAGAAGAACCAGAACTGGAAGATGATGATGAA<br/>TATGATGAACTGTGGTTTTCCGCTGTATTTTGAAGCGGAATGCAACCGCAACTATACCCTG<br/>CATGTGAACCATAGCTGCGATTATAGCGTGCGCCAGAGCAGCGTGAGCTTTCCGCCGTGG<br/>CGCGATATTGATAGCGTGACCTTTGTGCCGCGCAACCTGAGCAACTGCAGCGCGCATGGC<br/>CTGGCGGTGATTGTGGCGGGCAACCAGACCTGGTATGTGAACCGTTTTAGCCTGGCGCAT<br/>CTGCTGGATGCGATTTATAACGTGCTGGGCATTGAAGATCTGAGCGGAACTTTCCGCCG<br/>CAGCTGGCGCGTATCGCCATACCCTGATTGTGCCGAGACC</p>                                                                                                                                                                                                                                                                                                                                                                                                                                                                                                                                                                    |
